# Supplementary material for: Improved bi-allelic modification of a transcriptionally silent locus in patient-derived iPSC by Cas9 nickase
Source: PubMed Central journal article supplement (PMC5133597; doi:10.1038/srep38198), 2016-12-02
Supplement: srep38198-s1.pdf [file srep38198-s1.pdf]

# Supplementary Information

## Improved bi-allelic modification of a transcriptionally silent locus in patient-derived iPSC by Cas9 nickase

Reto Eggenschwiler\*,<sup>1,2</sup> Mohsen Moslem,<sup>1,2,3</sup> Mariane Serra Fráguas,<sup>1,2,4</sup> Melanie Galla<sup>5</sup>,  
Oliver Papp<sup>1,2</sup>, Maximilian Naujock<sup>6,7</sup>, Ines Fonfara,<sup>8,9</sup> Ingrid Gensch,<sup>1,2</sup> Annabell Wähler,<sup>1,2</sup>  
Abbas Beh-Pajoo,<sup>1,2</sup> Claudio Mussolino,<sup>10,11,12</sup> Marcel Tauscher<sup>13</sup>, Doris Steinemann<sup>13</sup>,  
Florian Wegner<sup>6</sup>, Susanne Petri<sup>6</sup>, Axel Schambach<sup>5</sup>, Emmanuelle Charpentier,<sup>8,9</sup> Toni  
Cathomen,<sup>10,11,12</sup>  
Tobias Cantz\*,<sup>1,2,14</sup>

<sup>1</sup>Research Group Translational Hepatology and Stem Cell Biology, Cluster of Excellence REBIRTH, Hannover Medical School, Hannover, 30625, Germany

<sup>2</sup>Department of Gastroenterology, Hepatology and Endocrinology, Hannover Medical School, Hannover, 30362, Germany

<sup>3</sup>present address: Department of Neuroscience, Karolinska Institute, Stockholm, 171 77, Sweden

<sup>4</sup>present address: Vascular Biology Division, Department of Medical Biochemistry and Biophysics (MBB), Karolinska Institute, Stockholm, 171 77, Sweden

<sup>5</sup>Institute of Experimental Hematology, Cluster of Excellence REBIRTH, Hannover Medical School, Hannover, 30625, Germany

<sup>6</sup>Department of Neurology, Hannover Medical School, Hannover, 30625, Germany

<sup>7</sup>present address: Boehringer Ingelheim Pharma GmbH & Co. KG, CNS Diseases Research, Biberach, 88400, Germany

<sup>8</sup>Max Planck Institute for Infection Biology, Department of Regulation in Infection Biology, Berlin, 10117, Germany

<sup>9</sup>The Laboratory for Molecular Infection Medicine Sweden (MIMS), Umeå Centre for Microbial Research (UCMR), Department of Molecular Biology, Umeå University, Umeå, 90187, Sweden

<sup>10</sup>Center for Chronic Immunodeficiency, Medical Center - University of Freiburg, Freiburg, 79106, Germany

<sup>11</sup>Institute for Cell and Gene Therapy, Medical Center - University of Freiburg, Freiburg, 79106, Germany

<sup>12</sup>Faculty of Medicine, University of Freiburg, Freiburg, 79106, Germany

<sup>13</sup>Institute of Human Genetics, Hannover Medical School, Hannover, 30625, Germany

<sup>14</sup>Max Planck Institute for Molecular Biomedicine, Cell and Developmental Biology, Münster, 48149, Germany

## Table of Contents

|                                       |         |
|---------------------------------------|---------|
| Supplementary Figure <b>S1</b>        | page 2  |
| Supplementary Table <b>S2</b>         | page 4  |
| Supplementary Figure <b>S3</b>        | page 5  |
| Supplementary Table <b>S4</b>         | page 6  |
| Supplementary Figure <b>S5</b>        | page 8  |
| Supplementary Figure <b>S6</b>        | page 11 |
| Supplementary Table <b>S7</b>         | page 12 |
| Supplementary Figure <b>S8</b>        | page 26 |
| Supplementary Experimental Procedures | page 28 |

**Supplementary Figure S1: Allele-specific nicking, efficiencies of different nickases and analysis of sgRNAs for other disease-related loci**

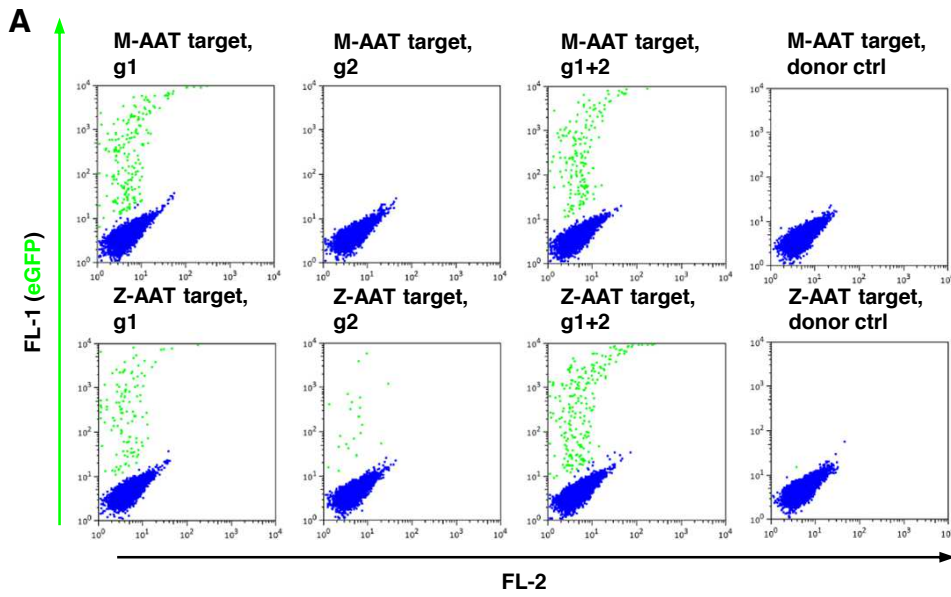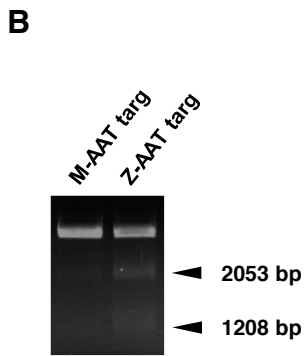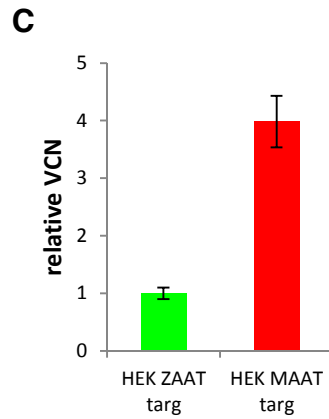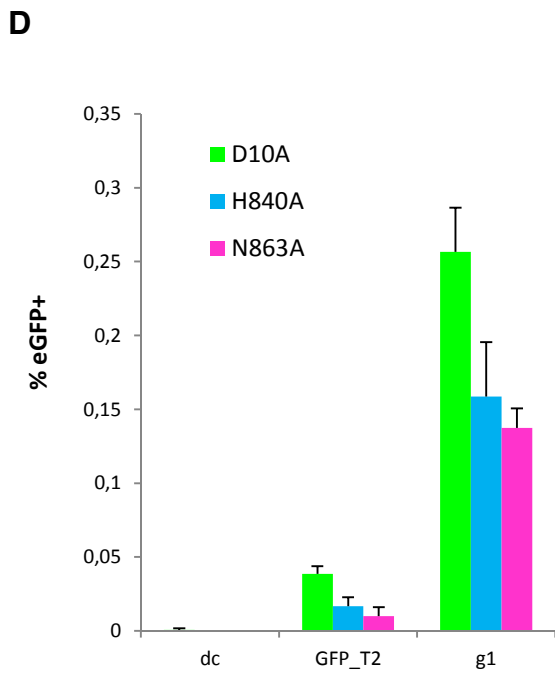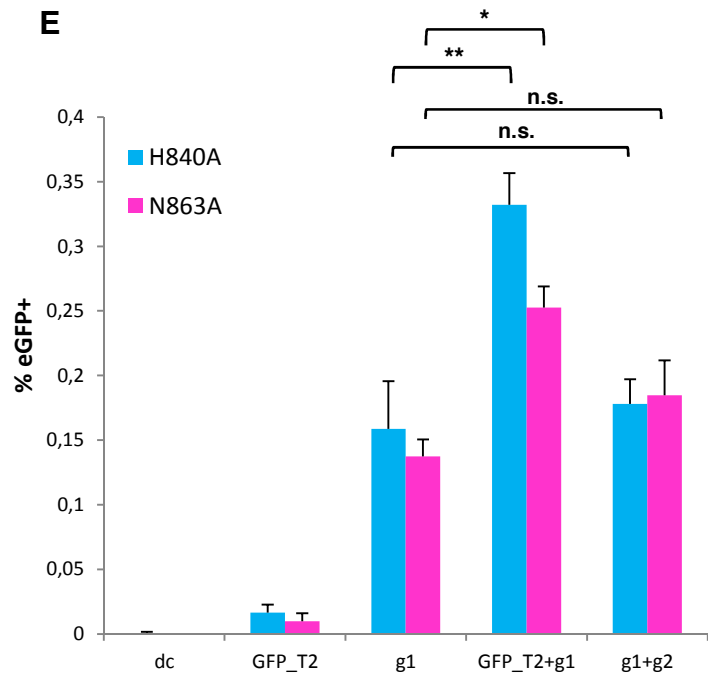

**F** Targeting of TTR sequence in proximity of V30M mutation, which causes Familial Amyloid Polyneuropathy (FAP)

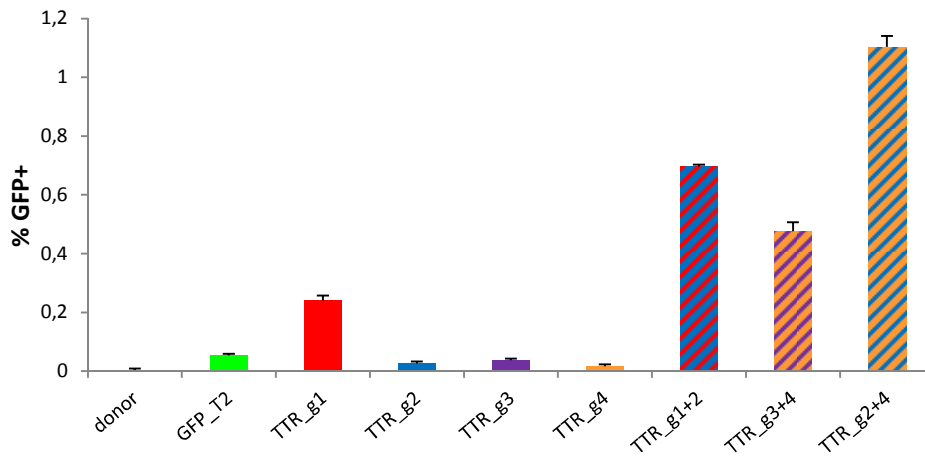

**G** Targeting of SOD1 sequence in proximity of D90A and R115G mutations, which cause Amyotrophic Lateral Sclerosis (ALS)

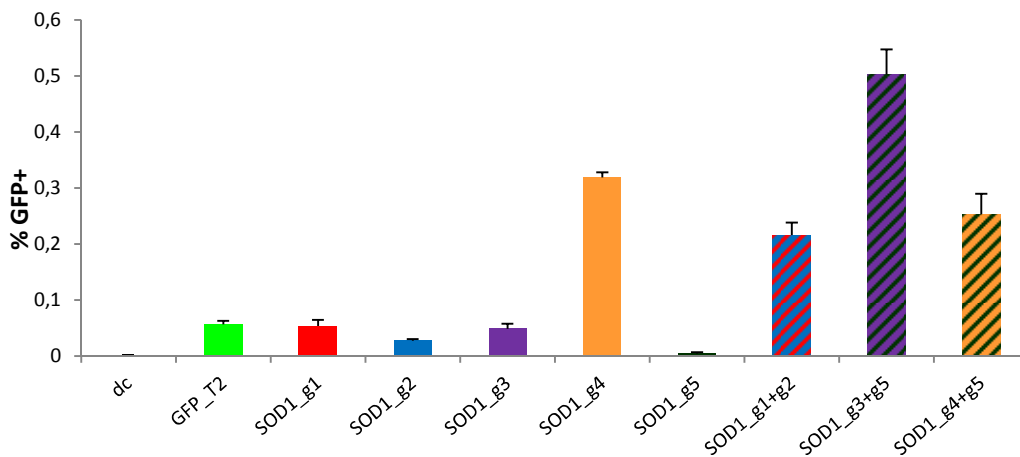

**Supplementary Figure S1: Allele-specific nicking, efficiencies of different nickases and analysis of sgRNAs for other disease-related loci (A)** Representative FACS blots of HEK M-AAT and Z-AAT reporter cells transfected with tGiP donor + Cas9\_D10A + AAT\_g1 gRNA (g1), AAT\_g2 gRNA (g2) or AAT\_g1 + AAT\_g2 gRNAs (g1+2). 50'000 events gated from FSC/SSC are displayed. **(B)** *In vitro* Cas9 digest of plasmids containing M-AAT or Z-AAT target sequences using tracrRNA + crRNA\_AAT\_g2. **(C)** QRT-PCR-based analysis of relative lentiviral vector copy numbers in M-AAT and Z-AAT reporter cell lines. **(D)** FACS analysis of HEK Z-AAT reporter cells transfected with different nickases Cas9\_D10A, Cas9\_H840A and Cas9\_N863A. **(E)** FACS analysis of HEK Z-AAT reporter cells transfected with HNH-deficient nickases Cas9\_H840A or Cas9\_N863A and different sgRNAs and sgRNA combinations. Double nicking with AAT\_g1 gRNA and GFP\_T2 gRNA results in a 5' overhang, increasing overall HDR efficiency, whereas double nicking with AAT\_g1 gRNA and AAT\_g2 gRNA results in a 3' overhang and no significant change in HDR efficiency. dc: donor control = cells transfected with Cas9\_D10A and tGiP donor only. **(F)** FACS analysis of HEK TTR reporter cells transfected with Cas9\_D10A, tGiP donor and different TTR sgRNAs. **(G)** FACS analysis of HEK SOD1 reporter cells transfected with Cas9\_D10A, tGiP donor and different SOD1 sgRNAs. dc = donor control (Cas9\_D10A + tGiP only), GFP\_T2 = sgRNA binding to eGFP upstream of the target sequence, serving as internal reference. Data are represented as mean  $\pm$  SD and statistical analysis was performed by two-tailed student's t-test where \* =  $p < 0.05$ , \*\* =  $p < 0.01$ , n.s. = not significant, n = 3 biological replicates.

**Supplementary Table S2: top five potential off-targets of AAT sgRNAs**

**AAT\_g1 sgRNA:**

| sequence                | score | mismatches       | UCSC gene | locus           |
|-------------------------|-------|------------------|-----------|-----------------|
| GCACACCATCATGCACGGCCCAG | 1,4   | 3MMs [6:8:10]    |           | chr7:-152171049 |
| CCCCATCCTGATGCACGGCCCGG | 0,8   | 4MMs [1:3:6:10]  | NR_038080 | chr17:-79277406 |
| GAGCTGCCTTCTGCACGGCCAGG | 0,8   | 4MMs [2:3:5:11]  |           | chr1:-45138716  |
| CCACAGCATGCTGCACGGCCAGG | 0,7   | 4MMs [1:8:10:11] | NM_001089 | chr16:+2369799  |
| CCACAGCCTTCTGCACTGCCAAG | 0,7   | 3MMs [1:11:17]   |           | chr2:-101478981 |

**off-target score** 4,4

**AAT\_g2 sgRNA:**

| sequence                | score | mismatches      | UCSC gene    | locus           | comments   |
|-------------------------|-------|-----------------|--------------|-----------------|------------|
| GTGCTGACCATCGACGAGAAAGG | 17,2  | 1MMs [16]       | NM_001002235 | chr14:-94844958 | (SERPINA1) |
| GAGCTGACCATCTACAAGAAGAG | 3,6   | 2MMs [2:13]     |              | chr1:-196503098 |            |
| GTGGTGACCATCAACAAGAAGAG | 3,1   | 2MMs [4:13]     | NM_001166434 | chr3:+52824768  |            |
| GTGGTGAGCATGGACAAGAATGG | 1,3   | 3MMs [4:8:12]   |              | chr16:+22795769 |            |
| ATGCTGGCCATGGACAAGAAAAG | 1     | 3MMs [1:7:12]   |              | chr2:+53247163  |            |
| TTTCTGAACATCTACAAGAAAAG | 0,6   | 4MMs [1:3:8:13] |              | chr4:+171459021 |            |

26,8  
-17,2 (SERPINA1)

**off-target score** 9,6

**AAT\_g3 sgRNA:**

| sequence                | score | mismatches      | UCSC gene    | locus           | comments   |
|-------------------------|-------|-----------------|--------------|-----------------|------------|
| TTCAGTCCCTTTCTCGTCGATGG | 26,8  | 1MMs [15]       | NM_001002235 | chr14:+94844931 | (SERPINA1) |
| CTCTTTCCCGTTCTTGTCGAAAG | 1,3   | 4MMs [1:4:5:10] |              | chr1:-161015912 |            |
| TTCTTTCCCTTTCTTGCTAAAG  | 1,0   | 3MMs [4:5:19]   |              | chr9:+84446321  |            |
| AACATTCCCTCTTTGTCGAGGG  | 0,8   | 4MMs [1:2:5:11] |              | chr2:+172685105 |            |
| TTTTGTCCCTTTCTTGTTGACAG | 0,6   | 3MMs [3:4:18]   |              | chr8:-26517054  |            |
| ATCAGTCCCTGTCTTGTCAGAG  | 0,6   | 3MMs [1:11:19]  |              | chr6:-78348659  |            |

30,5  
-26,8 (SERPINA1)

**off-target score** 3,7

**AAT\_g4 sgRNA:**

| sequence                | score | mismatches    | UCSC gene | locus            |
|-------------------------|-------|---------------|-----------|------------------|
| GAAAGGGAGTGAAGCTGCTGGGG | 61,1  | 1MMs [9]      |           | chr2:+116934446  |
| GGGAGGGACAGAAGCTGCTGCAG | 2,4   | 3MMs [2:3:10] |           | chr7:-31097292   |
| AAAGTGGACTGAAGCTGCTGCAG | 2,4   | 3MMs [1:4:5]  |           | chr12:-120809699 |
| GAAGAGGACAGAAGCTGCTGAGG | 2,3   | 3MMs [4:5:10] |           | chrX:+74959542   |
| AAAAGGCACAGAAGCTGCTGAGG | 1,7   | 3MMs [1:7:10] |           | chrX:-150553515  |

**off-target score** 69,9

**Supplementary Figure S3: FACS controls for silencing studies and analysis of puromycin selected clones generated with CAG donor construct**

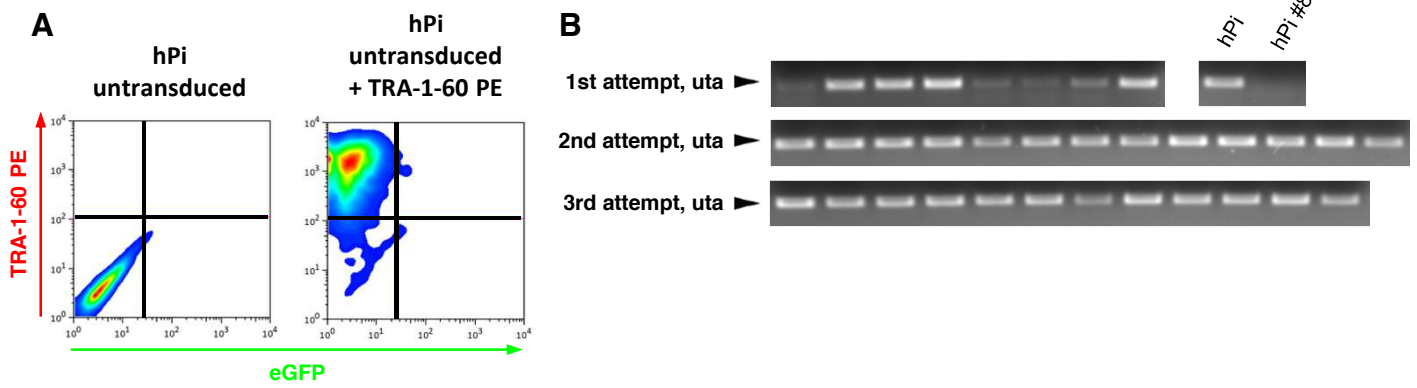

**Supplementary Figure S3: FACS controls for silencing studies and analysis of puromycin selected clones generated with CAG donor construct (A)** FACS controls of TRA-1-60 PE-stained and unstained hPi for gating of transgene silencing analysis. **(B)** PCR analysis for the untargeted *SERPINA1*-allele (*uta*) in AAT-PB-CG2Ap $\Delta$ tk + Cas9\_D10A + AAT\_g1 + AAT\_g2 transfected and puromycin-selected clonal cell lines. In 3 separate rounds and a total of 33 clones, no bi-allelic modifications were detected.

**Supplementary Table S4: Cloning primers, cloned sequences and PCR primers**

**cloning primers**

| <u>primer name</u>    | <u>sequence</u>                                                               |
|-----------------------|-------------------------------------------------------------------------------|
| PGK ClaI for          | GGTATCGATAAGCTTGATATCGAATAATTC                                                |
| PGK XhoI rev          | T TACTCGAGGGTTTAGTTCCTCACCTTGTCGTATTATAC                                      |
| T2A BsrGI for         | TTTTGTACAAGGGCTCCGGAGAGGGCCGG                                                 |
| T2A Tth111I rev       | TTAGACGTCGTCGCGGGTGCGGAGGCGCACCGTGGGCTTGTACTCGGTCATGGAGGGGCCGG<br>GGTTCCTCCTC |
| DsRed AgeI for        | TACCGTCGACGGATCCACCGGTC                                                       |
| DsRed SexAI mut rev   | TCTTGGCCATGTAGATGGACTTGAACCTCCACgAGGTAGTGGCCGCGC                              |
| DsRed + YK rev        | TTATGTACAGGAACAGGTGGTGGCGGC                                                   |
| CMV NheI for          | TATGCTAGCGACATTGATTATTGACTAGTTATTAATAGTAATC                                   |
| CMV MluI rev          | AAAACGCGTGACCATGGTAATAGCGATGACTAATAC                                          |
| CBA AscI for          | AAAGGCGCGCCGAGGTGAGCCCCACGTTCTG                                               |
| CBA PciI rev          | AAAACATGTTGCCAAAATGATGAGACAGCAC                                               |
| PGK AgeI for          | CATCCACCGGTAGGCGCCAACCG                                                       |
| puro change RsrII rev | TTTCGGTCCGGGTCGACGGTGTGGCGCGTGGCGGGGTAGTCGGCGAACGCGGCGGCGAGGG<br>TGCGcACGGCCC |

**cloned sequences**

| <u>sequence name</u>   | <u>sequence</u>                                                                                                                                                             |
|------------------------|-----------------------------------------------------------------------------------------------------------------------------------------------------------------------------|
| ZAAT target sequence   | CCAGGCCGTGCATAAGGCTGTGCTGACCATCGACaAGAAAGGGACTGAAGCTGCTGGGG*                                                                                                                |
| MAAT target sequence   | CCAGGCCGTGCATAAGGCTGTGCTGACCATCGACgAGAAAGGGACTGAAGCTGCTGGGG                                                                                                                 |
| AAT_g1 guide sequence  | G-CACAGCCTTATGCACGGCC                                                                                                                                                       |
| AAT_g2 guide sequence  | G-TGCTGACCATCGACAAGAA                                                                                                                                                       |
| AAT_g3 guide sequence  | G-TCAGTCCCTTTCTTGTCTGA                                                                                                                                                      |
| AAT_g4 guide sequence  | G-AAAGGGACTGAAGCTGCTG<br>*: SNP rs28929474 (E342K)                                                                                                                          |
| TTR target sequence    | CCCAGGGCACCGGTGAATCCAAGTGTCTCTGATGGTCAAAGTTCTAGATGCTGTCCGAGGCA<br>GTCCTGCCATCAATGTGGCCaTGCATGTGTTCCAGAAAGGCTGCTGATGACACCTGGGAGCCATT<br>TGCCTCTGGGCGCGCC*                    |
| TTR_g1 guide sequence  | G-CTTGGATTACCGGTGCCC                                                                                                                                                        |
| TTR_g2 guide sequence  | G-AAGTTCTAGATGCTGTCCG                                                                                                                                                       |
| TTR_g3 guide sequence  | G-GCATGGCCACATTGATGGC                                                                                                                                                       |
| TTR_g4 guide sequence  | G-CCTGGGAGCCATTTGCCTC<br>*: SNP rs28933979 (V30M)                                                                                                                           |
| SOD1 target sequence   | ACCGTCTCAATCCATCTGATGCTTTTTTCATTATTAGGCATGTTGGAGACTTGGGCAATGTGACT<br>GCTGcCAAAGATGGTGTGGCCGATGTGTCTATTGAAGATTCTGTGATCTCACTCTCAGGAGACC<br>ATTGCATCATTGGCGGCACACTGGGGCGCGCC** |
| SOD1_g1 guide sequence | G-AAAAAGCATCAGATGGATT                                                                                                                                                       |
| SOD1_g2 guide sequence | G-ACTGCTGCCAAAGATGGTG                                                                                                                                                       |
| SOD1_g3 guide sequence | G-GAATCTTCAATAGACACAT                                                                                                                                                       |
| SOD1_g4 guide sequence | G-TGTGCCGCCAATGATGCAA                                                                                                                                                       |
| SOD1_g5 guide sequence | G-TGCATCATTGGCGGCACAC<br>*: SNP rs80265967 (D90A); *: R115G                                                                                                                 |

**PCR primers for integration detection and southern blot probes**

| <u>primer name</u>     | <u>sequence</u>             | <u>annealing (°C)</u> | <u>application</u>                      |
|------------------------|-----------------------------|-----------------------|-----------------------------------------|
| left AAT homol for     | CAAAGCCGAGTCCCATCTTAG       | 60 / 65.6             | Fig. 2B, 2C, 3F, S5C / 3F (full length) |
| left AAT homol rev     | GCGACTGAGATGTCTAAATGCAC     | 60                    | Fig. 2B, 2C, 3F, S5C                    |
| right AAT homol for    | TCTATGGCTTCTGAGGCGGAAAG     | 65.6                  | Fig. 2B, 2C, 3F, S5C                    |
| right AAT homol rev #3 | TTCCTGGCTGCTGTGCTCTTAG      | 65.6                  | Fig. 2B, 2C, 3F, S5C                    |
| det gen A1AT for       | GTG TCC ACG TGA GCC TTG CTC | 60                    | Fig. 2B, 2C, 3E, 3F, S3B, S5B           |
| det gen A1AT rev       | GTT TGT TGA ACT TGA CCT CGG | 60                    | Fig. 2B, 2C, 3E, 3F, S3B, S5B           |
| CAG end for            | TCCTGGGCAACGTGCTGGTTATTG    | 69.6 / 66.5           | Fig S5E (eGFP) / S5E (DsRedEx)          |
| eGFP_det rev           | TCACCTTGATGCCGTTCTTC        | 69.6                  | Fig S5E                                 |
| DsRedEx rev            | CGCGCTCGTACTGCTCCACG        | 66.5                  | Fig S5E                                 |
| AAT_sb_left for        | ATTCGTGATTATGCCCATGCC       | 65.4                  | southern blot probe #1                  |
| AAT_sb_left rev        | ATGGGAACCTCGGCTTTGGTTT      | 65.4                  | southern blot probe #1                  |
| AAT_sb_right for       | GCCATTGCAAGGACTCCTCA        | 65.4                  | southern blot probe #2                  |
| AAT_sb_right rev       | TTCCTGGTAGAGACGGAGGG        | 65.4                  | southern blot probe #2                  |

**southern blot probes**

probe #1 (549 bp)  
 ATTCGTGATTATGCCCATGCCCTGCTGATCTAGTTCTGTTTTGTACACTGTAAAACCAAGATGAAA  
 ATACAAAAGGTGTCGGGTTTCATAATAGGAATCGAGGCTGGAATTTCTCTGTTCCATGCCAGCAC  
 CTCCTGAGGTCTCTGCTCCAGGGTTGAGAAAAGAAACAAAGAGGCTGAGAGGGTAACGGATCAG  
 AGAGCCCAGAGCCAAGCTGCCGCTCACACCAGACCCTGCTCAGGGTGGCATTGTCTCCCAT  
 GGAAAACCAGAGAGGAGCACTCAGCCTGGTGTGGTCACTTTCTCTTATCCACTAAACGGTTGT  
 CACTGGGCACTGCCACCAGCCCCGTGTTTTCTGTTGGTGTAGGGCCCTGGGGATGTTACAGGCT  
 GGGGGCCAGGTGACCCAACACTACAGGGCAAGATGAGACAGGCTCCAGGACACCTAGAATAT  
 CAGAGGAGGTGGCATTTCAGCTTTTGTGATTTCATTCGATGTTAACATTCTTTGACTCAATGTAG  
 AAGAGCTAAAAGTAGAACAACCAACCAAGCCGAGTTCAT

probe #2 (317 bp)  
 GCCATTGCAAGGACTCCTCAGCTATGGGAGAGGAAGCACATCACCCATTGACCCCCGCAACCC  
 CTCCTTTCTCCCTCCTGAGTCCCGACTGGGGCCACATGCAGCCTGACTTCTTTGTGCCTGTTGC  
 TGTCCTGCAGTCTTCAGAGGGCCACCGCAGCTCCAGTGCCACGGCAGGAGGCTGTTCTGAA  
 TAGCCCCGTGGTAAGGGCCAGGAGAGTCCTTCATCCTCCAAGGCCCTGCTAAAGGACACAG  
 CAGCCAGGAAGTCCCCTGGGCCCTAGCTGAAGGACAGCCTGCTCCCTCCGTCTTACCAGGA  
 A\*

\*: SNP rs1243166

**off-target analysis PCR primers**

| <u>primer name</u> | <u>sequence</u>           | <u>annealing (°C)</u> | <u>genomic off-target site</u> |
|--------------------|---------------------------|-----------------------|--------------------------------|
| AAT_g1_OT1 for     | TTGTTTACCAGTCCCCAGGC      | 62.2                  |                                |
| AAT_g1_OT1 rev     | TCAAGGCAAGGACTGTGCTC      | 62.2                  | GCACACCATCATGCACGGCCCCAG       |
| AAT_g1_OT2 for     | TGGAAAATACCCTGTGGCCC      | 62.2                  |                                |
| AAT_g1_OT2 rev     | TTTGAGGCTTTCCCGGTAGG      | 62.2                  | CCCCATCCTGATGCACGGCCCCGG       |
| AAT_g1_OT3 for     | TTCCAGATCCCTCCCGTAG       | 62.2                  |                                |
| AAT_g1_OT3 rev     | GAGGGAGGCAGGACAAAACA      | 62.2                  | GAGCTGCCTTCTGCACGGCCAGG        |
| AAT_g1_OT4 for     | GACAGCGCGGTTTCTAGAGT      | 62.2                  |                                |
| AAT_g1_OT4 rev     | TGTCAGTGTGTGGTGCCTTT      | 62.2                  | CCACAGCATGCTGCACGGCCAGG        |
| AAT_g1_OT5 for     | CCCAATGCGTGTTCAGGTG       | 62.2                  |                                |
| AAT_g1_OT5 rev     | CTGATCAGACCTCGGAAGGG      | 62.2                  | CCACAGCCTTCTGCACTGCCAAG        |
| AAT_g2_OT1 for     | TGTGGTTTTCCGAGGTAGTGC     | 62.2                  |                                |
| AAT_g2_OT1 rev     | CTCAGCTTGGGTGCAGAAGT      | 62.2                  | GAGCTGACCATCTACAAGAAGAG        |
| AAT_g2_OT2 for     | AAGGGCAGCTGAATGGAGAG      | 62.2                  |                                |
| AAT_g2_OT2 rev     | ATCCGATGACTGTCCAGCAC      | 62.2                  | GTGGTGACCATCAACAAGAAGAG        |
| AAT_g2_OT3 for     | CATGCCAAAATGCGAAGCAG      | 62.2                  |                                |
| AAT_g2_OT3 rev     | GGCGCGTCTCTGTAATTTATC     | 62.2                  | GTGGTGAGCATGGACAAGAATGG        |
| AAT_g2_OT4 for     | ACCAAGTAGCAAGCTGACCA      | 62.2                  |                                |
| AAT_g2_OT4 rev     | ACAATCACATAACATGGGACTGAAT | 62.2                  | ATGCTGGCCATGGACAAGAAAAG        |
| AAT_g2_OT5 for     | ATGACAACCTTCACTGTCGCA     | 62.2                  |                                |
| AAT_g2_OT5 rev     | TCACCCACAGAACGTAAGCA      | 62.2                  | TTTCTGAACATCTACAAGAAAAG        |

Supplementary Figure S5: Extended analysis of targeted and gene corrected clones

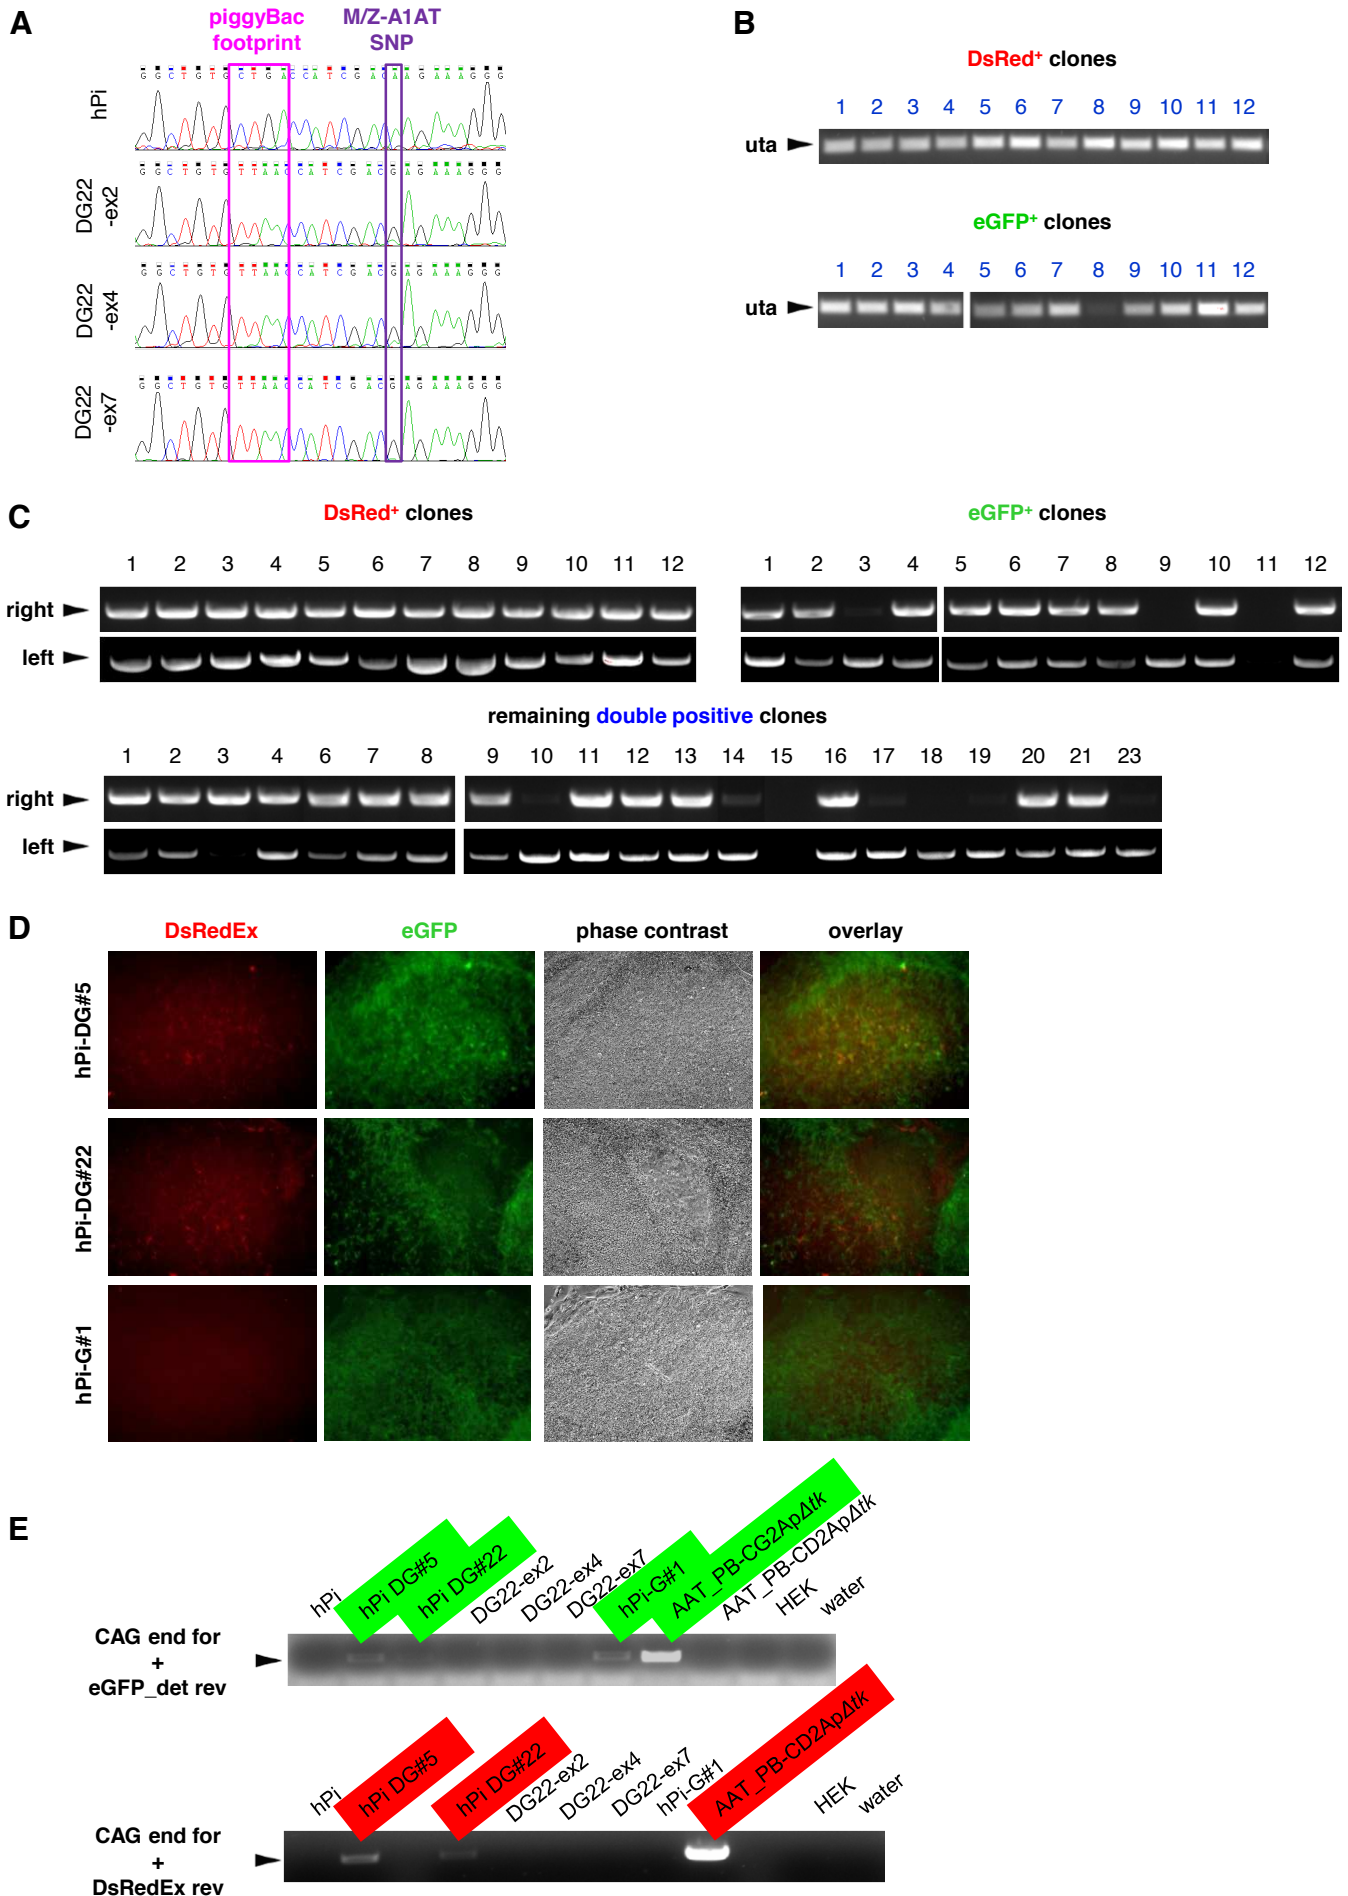



**F** *uta*: untargeted and/or excised alleles: 9596 bp (EcoRI), 8796 bp (BspHI)

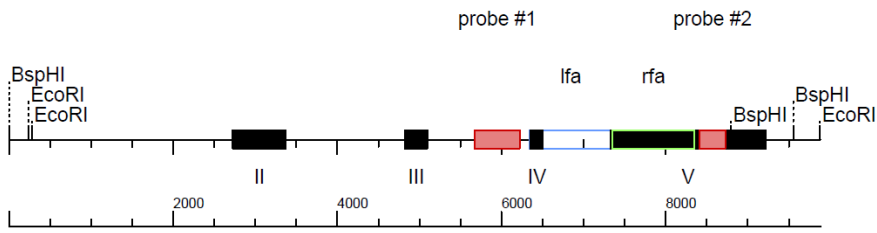

**ta**: targeted alleles, BspHI digest: 13860 bp (eGFP), 13824 bp (DsRedEx)

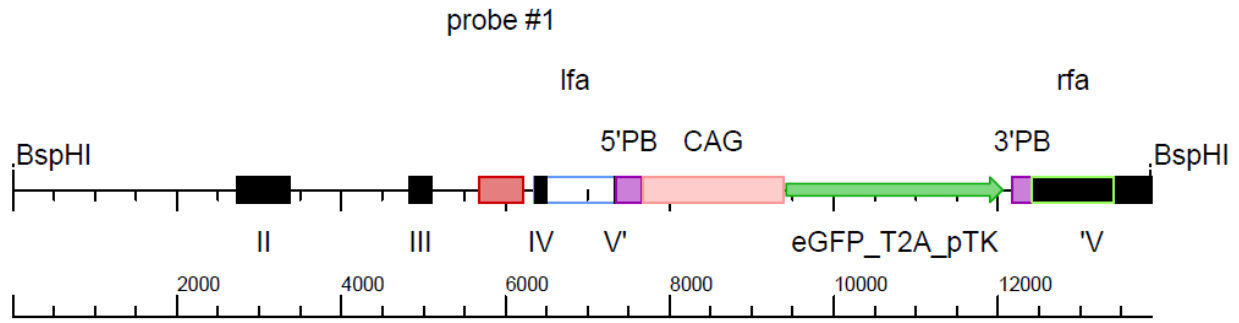

**ta**: targeted alleles, EcoRI digest: 5552 bp (eGFP), 5516 bp (DsRedEx)

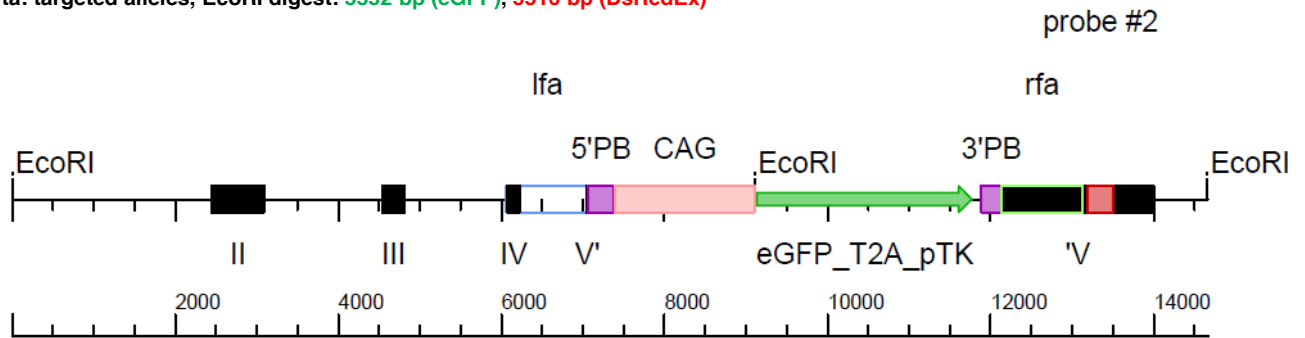

**G** EcoRI digest, probe#2

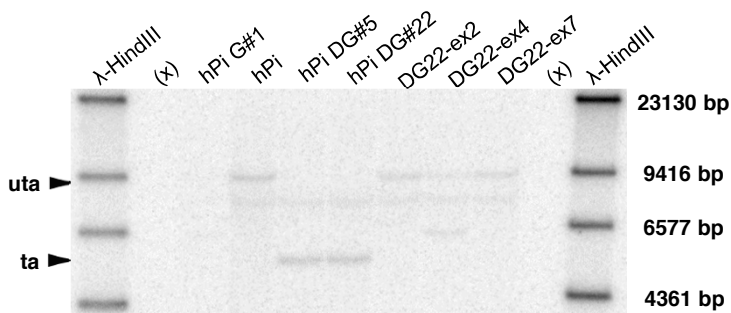

**H** BspHI digest, probe#1

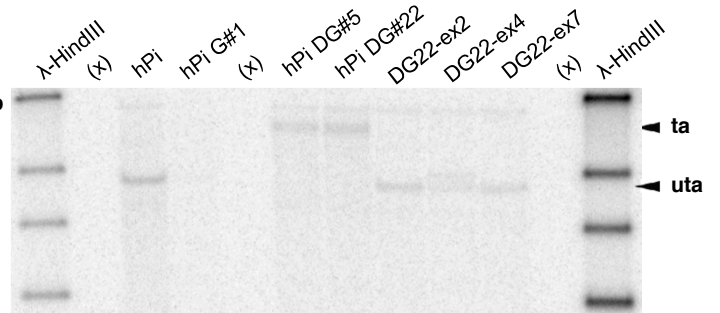

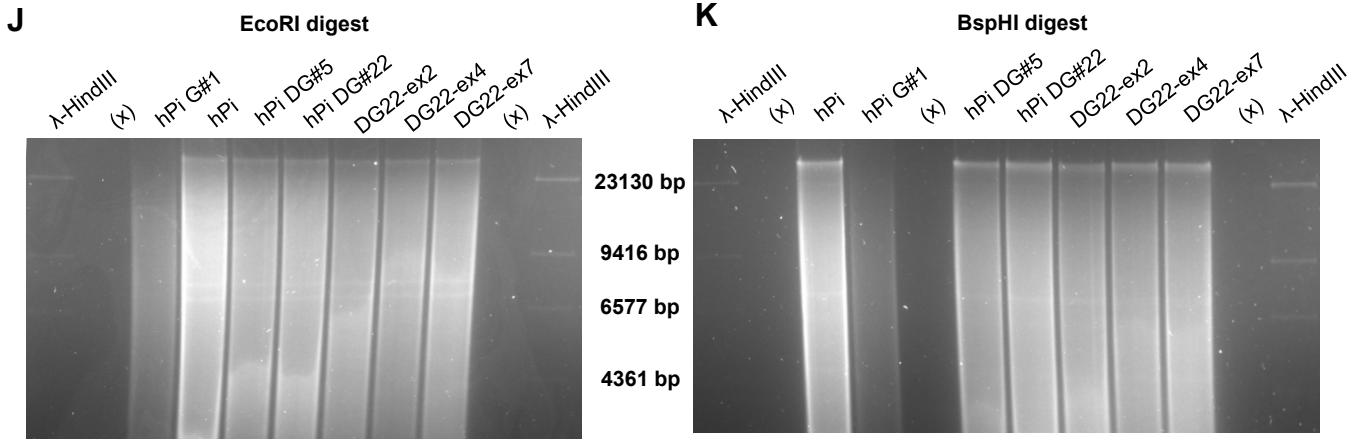

**Supplementary Figure S5: Extended analysis of targeted and gene corrected clones** (A) Sequencing of gene-corrected hPi-derived cell lines. PiggyBac footprint remains at a site in Exon V where the CTG-codon for leucine is followed by an A, leading to synonymous substitution of the codon. (B) PCR analysis for the untargeted *SERPINA1*-allele in sorted eGFP+ and DsRedEx+ single positive clonal cell lines (C) PCR analysis of clones isolated from sorted cell populations for integration of left and right homology flanking arms. (D) Fluorescence images depicting eGFP and DsRedEx signal in mono- and bi-allelic targeted hPi cells. hPi-G#1 were sorted from eGFP single positive fraction and are targeted on one allele, whereas hPi-DG#5 and hPi-DG#22 were sorted from double-positive fraction and are targeted on both alleles. (E) PCR analysis for detection of eGFP and DsRedEx in bi-allelic targeted and excised cell lines, as well as mono-allelic targeted hPi-G#1. hPi and an HEK239-T served as negative whereas diluted donor plasmids served as positive controls. (F) Setup of Southern blot for detection of donor plasmid integration and excision: gDNA digested with BspHI enzyme was probed with a 549 bp PCR fragment matching upstream of the left flanking arm (probe #1) and gDNA digested with EcoRI enzyme was probed with a 317 bp PCR fragment matching downstream of the right flanking arm (probe #2). lfa = left flanking arm (blue frame); rfa = right flanking arm (green frame); II, III, IV, V = human *SERPINA1* Exons (black boxes); 5'PB, 3'PB = piggyBac recognition sites (purple); CAG = CAG enhancer/promoter (rose); eGFP\_T2A\_pTK = fluorescence + selection / counter-selection cassette (green arrow). (G) Southern blot with EcoRI digested gDNA hybridized with probe #2. (H) Southern blot with BspHI digested gDNA hybridized with probe #1. (J, K) Agarose-gel images of Southern blots from Fig. S5G and S5H, showing successful digest and quality of gDNA. λ-HindIII = Lambda DNA digested with HindIII marker; (x) = empty lane; ta = targeted allele; uta = untargeted allele.

**Supplementary Figure S6: Extended functional characterization of bi-allelic targeted and bi-allelic corrected clones.**

**A**

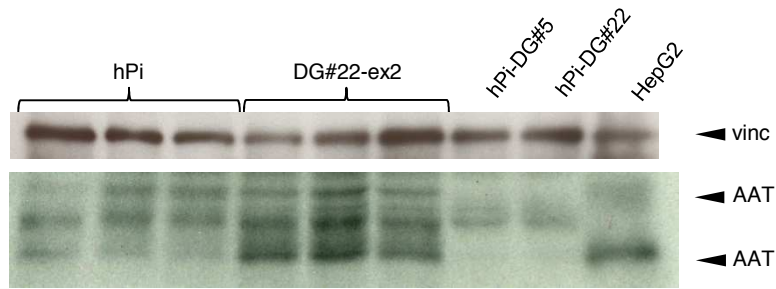

**B**

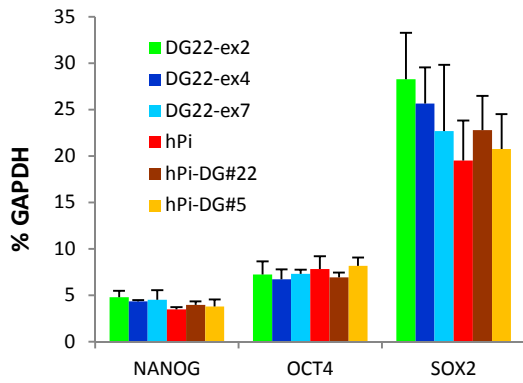

**C**

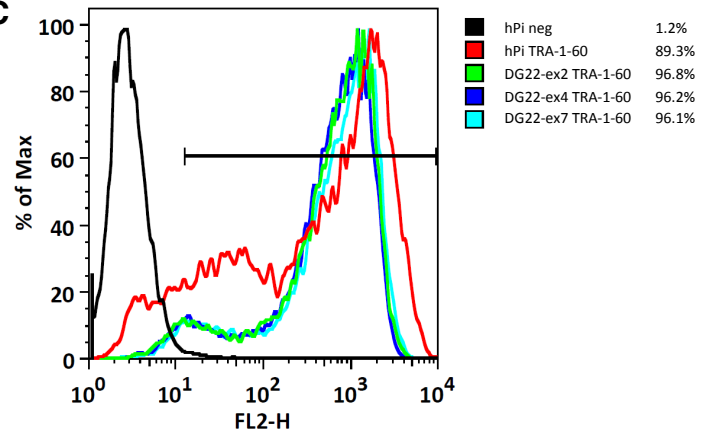

**Supplementary Figure S6: Extended functional characterization of bi-allelic targeted and bi-allelic corrected clones (A)** Western blot for total human AAT in d17 hepatic differentiated iPSC using mouse monoclonal 2B12 antibody. Differentiation of parental hPi and gene-corrected DG22-ex2. hPi-DG#5 and hPi-DG#22 served as negative whereas HepG2 served as positive control. **(B)** Taqman qRT-PCR expression-analysis of pluripotency markers NANOG, OCT4 and SOX2 in undifferentiated hPi, targeted hPi-DG#5 and hPi-DG#22 and gene-corrected DG22-ex2, DG22-ex4 and DG22-ex7. **(C)** FACS analysis for of hPi and gene corrected cell lines stained with  $\alpha$ -TRA-1-60 PE-conjugated antibody. Data in Fig. S6D are represented as mean  $\pm$  SD with n = 3 biological replicates.

Genome: hg19  
 Aberration Algorithm: ADM-2  
 Threshold: 7.0  
 Fuzzy Zero: ON  
 GC Correction: ON  
 Window Size: 2Kb  
 Centralization (legacy): ON  
 Centralization (legacy) Bin Size: 10  
 Centralization (legacy) Threshold: 7.0  
 Diploid Peak Centralization: ON  
 Manually Reassign Peaks: OFF  
 Combine Replicates (Intra Array): ON  
 Combine Replicates (Inter Array): ON  
 Inter Array Group By: Amt Cy3 used(ug)  
 Array Level Filter: NONE

Aberration Filter: ( Minimum Number of Probes for Amplification >= 4 AND Minimum Size (Kb) of Region for Amplification >= 0.0 AND Minimum Avg. Absolute Log Ratio for Amplification >= 0.3 ) OR ( Minimum Number of Probes for Deletion >= 4 AND Minimum Size (Kb) of Region for Deletion >= 0.0 AND Minimum Avg. Absolute Log Ratio for Deletion >= 0.3 )

Feature Level Filter: glsSaturated = true OR rlsSaturated = true OR glsFeatNonUnifOL = true OR rlsFeatNonUnifOL = true OR LogRatio = 0

Design Level Filter: Homology = 0 OR IsPseudoautosomal = 1

Genomic Boundary: OFF

Show Flat Intervals: OFF

| AberrationNo                | Chr | Cytoband   | Start     | Stop      | #Probes | Amplification | Deletion   | pval     | Gene Names | omim_feb2016    | Hs_hg19_CNV_20120403                                                                                                                                                                                                                                                                                                                                       |
|-----------------------------|-----|------------|-----------|-----------|---------|---------------|------------|----------|------------|-----------------|------------------------------------------------------------------------------------------------------------------------------------------------------------------------------------------------------------------------------------------------------------------------------------------------------------------------------------------------------------|
| C3_ihg2016_252185028566_1_2 |     |            |           |           |         |               |            |          |            |                 |                                                                                                                                                                                                                                                                                                                                                            |
|                             | 1   | chr1 p31.2 | 69289409  | 69363038  | 6       | 0.000000      | -1.011.855 | 4,09E-24 |            |                 |                                                                                                                                                                                                                                                                                                                                                            |
|                             | 2   | chr1 p31.1 | 72768855  | 72795480  | 5       | 0.000000      | -3.156.342 | 2,99E-59 |            |                 | CNV_4229, CNV_0383, CNV_34829, CNV_3293, CNV_34830, CNV_34831, CNV_34832, CNV_34833, CNV_74531, CNV_74532, CNV_84304, CNV_105572, CNV_23231, CNV_97396, CNV_60842, CNV_103487, CNV_22923, CNV_58405, CNV_104750, CNV_111188, CNV_43688, CNV_64030, CNV_6832, CNV_30388, CNV_31627, CNV_1005, CNV_1006, CNV_1543, CNV_37834, CNV_1009, CNV_84305, CNV_74533 |
|                             | 3   | chr1 q21.3 | 152556449 | 152581944 | 6       | 0.000000      | -1.581.137 | 8,77E-46 | LCE3C      | omimGene:612615 | CNV_8333, CNV_3314, CNV_53646, CNV_34711, CNV_34712, CNV_0393, CNV_34713, CNV_6786, CNV_74715, CNV_97511, CNV_84576, CNV_107201, CNV_22907, CNV_1558, CNV_103653, CNV_23222, CNV_105006, CNV_112109, CNV_37400, CNV_64960, CNV_38795, CNV_30438, CNV_31661, CNV_38961, CNV_1019, CNV_84577, CNV_74714, CNV_1018, CNV_31662                                 |

|        |               |           |           |                      |            |           |                  |                                                                                                                                                                                                                                                                                                                                                                                                                                                                                                                                                                                                                                                                                                                                                                                                                                                                                                                                                                                                                                                                                                                                                                                                                                                                                                                                                                                                                                                                                                                          |                                                                                                                                                                                                                                                                                                                                                                                                                                                                                                                                                                                                                             |
|--------|---------------|-----------|-----------|----------------------|------------|-----------|------------------|--------------------------------------------------------------------------------------------------------------------------------------------------------------------------------------------------------------------------------------------------------------------------------------------------------------------------------------------------------------------------------------------------------------------------------------------------------------------------------------------------------------------------------------------------------------------------------------------------------------------------------------------------------------------------------------------------------------------------------------------------------------------------------------------------------------------------------------------------------------------------------------------------------------------------------------------------------------------------------------------------------------------------------------------------------------------------------------------------------------------------------------------------------------------------------------------------------------------------------------------------------------------------------------------------------------------------------------------------------------------------------------------------------------------------------------------------------------------------------------------------------------------------|-----------------------------------------------------------------------------------------------------------------------------------------------------------------------------------------------------------------------------------------------------------------------------------------------------------------------------------------------------------------------------------------------------------------------------------------------------------------------------------------------------------------------------------------------------------------------------------------------------------------------------|
| 4 chr2 | p11.2 - p11.1 | 89456779  | 91766271  | 39 0.000000          | -0.701896  | 8,96E-79  |                  | CNV_34427, CNV_35873, CNV_107994, CNV_115389, CNV_104585, CNV_74122, CNV_59010, CNV_74104, CNV_34620, CNV_115397, CNV_74105, CNV_23246, CNV_4296, CNV_115405, CNV_78647, CNV_89796, CNV_74119, CNV_115399, CNV_7287, CNV_35877, CNV_74116, CNV_89797, CNV_89798, CNV_7288, CNV_89799, CNV_89800, CNV_89801, CNV_74109, CNV_4297, CNV_74103, CNV_104587, CNV_74117, CNV_104588, CNV_115406, CNV_78648, CNV_89802, CNV_89803, CNV_78649, CNV_78650, CNV_89804, CNV_2057, CNV_74126, CNV_74137, CNV_74127, CNV_115408, CNV_74125, CNV_74139, CNV_59011, CNV_104589, CNV_115410, CNV_37972, CNV_104236, CNV_2058, CNV_9954, CNV_50591, CNV_50592, CNV_1591, CNV_74138, CNV_68084, CNV_74128, CNV_78651, CNV_78652, CNV_89805, CNV_89806, CNV_78653, CNV_89807, CNV_89808, CNV_74129, CNV_4298, CNV_9956, CNV_50596, CNV_50597, CNV_50598, CNV_115409, CNV_78656, CNV_1353, CNV_59607, CNV_78654, CNV_74136, CNV_74141, CNV_74130, CNV_59012, CNV_78655, CNV_74131, CNV_74135, CNV_104590, CNV_89809, CNV_89810, CNV_23275, CNV_74140, CNV_68083, CNV_35878, CNV_1355, CNV_1354, CNV_9957, CNV_53731, CNV_35879, CNV_35880, CNV_59013, CNV_74132, CNV_35881, CNV_74133, CNV_30966, CNV_74134, CNV_3375, CNV_74142, CNV_97916, CNV_63132, CNV_22848, CNV_63181, CNV_115411, CNV_32325, CNV_32326, CNV_61793, CNV_23041, CNV_22637, CNV_74143, CNV_30967, CNV_35882, CNV_74147, CNV_74148, CNV_30968, CNV_74149, CNV_35883, CNV_30969, CNV_32327, CNV_35884, CNV_0527, CNV_35885, CNV_44038, CNV_115412, CNV_115413, CNV_115414 |                                                                                                                                                                                                                                                                                                                                                                                                                                                                                                                                                                                                                             |
| 5 chr3 | q26.1         | 162514534 | 162619141 | 10 0.000000          | -3.697.499 | 5,54E-164 |                  | CNV_30185, CNV_4359, CNV_3461, CNV_36095, CNV_0563, CNV_36096, CNV_98511, CNV_43698, CNV_63640, CNV_63641, CNV_104707, CNV_107837, CNV_110712, CNV_79986, CNV_91670, CNV_38805, CNV_103484, CNV_1649, CNV_107609, CNV_31126, CNV_7377, CNV_38965, CNV_32529, CNV_59583, CNV_59584, CNV_59608, CNV_91671, CNV_91672, CNV_110135, CNV_110510, CNV_4360, CNV_110136, CNV_1377, CNV_23278, CNV_59901, CNV_107999, CNV_110714, CNV_4361                                                                                                                                                                                                                                                                                                                                                                                                                                                                                                                                                                                                                                                                                                                                                                                                                                                                                                                                                                                                                                                                                       |                                                                                                                                                                                                                                                                                                                                                                                                                                                                                                                                                                                                                             |
| 6 chr4 | q13.2         | 69387056  | 69483277  | 12 0.563394          | 0.000000   | 1,85E-15  | UGT2B17, UGT2B15 | omimMorbid:601903                                                                                                                                                                                                                                                                                                                                                                                                                                                                                                                                                                                                                                                                                                                                                                                                                                                                                                                                                                                                                                                                                                                                                                                                                                                                                                                                                                                                                                                                                                        | CNV_3499, CNV_92177, CNV_38138, CNV_104781, CNV_110895, CNV_92178, CNV_106520, CNV_63852, CNV_31177, CNV_7448, CNV_23279, CNV_103525, CNV_38966, CNV_110896, CNV_110897, CNV_92179, CNV_1082, CNV_1083, CNV_1388, CNV_1389, CNV_110898, CNV_1390, CNV_1084, CNV_1085, CNV_1391, CNV_1392, CNV_63853, CNV_106521, CNV_92180, CNV_110900, CNV_110901, CNV_92181, CNV_106522, CNV_1087                                                                                                                                                                                                                                         |
| 7 chr6 | p21.32        | 32455274  | 32497381  | 6 1.252.292 0.000000 |            | 1,28E-23  | HLA-DRB5         | omimGene:604776                                                                                                                                                                                                                                                                                                                                                                                                                                                                                                                                                                                                                                                                                                                                                                                                                                                                                                                                                                                                                                                                                                                                                                                                                                                                                                                                                                                                                                                                                                          | CNV_3603, CNV_4493, CNV_64476, CNV_7567, CNV_37840, CNV_69469, CNV_69421, CNV_69472, CNV_31280, CNV_4767, CNV_111517, CNV_107632, CNV_111516, CNV_111496, CNV_81335, CNV_81336, CNV_81340, CNV_81342, CNV_81343, CNV_93642, CNV_93646, CNV_103651, CNV_23237, CNV_111505, CNV_111527, CNV_69411, CNV_69414, CNV_32790, CNV_111524, CNV_59326, CNV_37538, CNV_69427, CNV_69442, CNV_69416, CNV_81337, CNV_93647, CNV_69443, CNV_38969, CNV_81344, CNV_111507, CNV_111495, CNV_111529, CNV_69438, CNV_32791, CNV_111531, CNV_69444, CNV_69440, CNV_63176, CNV_69458, CNV_111503, CNV_106274, CNV_103652, CNV_59327, CNV_69445 |
| 8 chr7 | q33           | 133589546 | 133703003 | 20 0.533676          | 0.000000   | 1,22E-23  | EXOC4            | omimGene:608185                                                                                                                                                                                                                                                                                                                                                                                                                                                                                                                                                                                                                                                                                                                                                                                                                                                                                                                                                                                                                                                                                                                                                                                                                                                                                                                                                                                                                                                                                                          | CNV_3704                                                                                                                                                                                                                                                                                                                                                                                                                                                                                                                                                                                                                    |

|          |               |           |           |             |           |                                                                                            |                                                           |                                                                                                                                                                                                                                                                                                                                                                                                                                                                                                                                                                                                                                                                                                                                                                                                                                                                                                                                                                                                                                                                                                                                                                                                                                                                                                                                                                                                                                                                                                                                                                                                                                                                    |
|----------|---------------|-----------|-----------|-------------|-----------|--------------------------------------------------------------------------------------------|-----------------------------------------------------------|--------------------------------------------------------------------------------------------------------------------------------------------------------------------------------------------------------------------------------------------------------------------------------------------------------------------------------------------------------------------------------------------------------------------------------------------------------------------------------------------------------------------------------------------------------------------------------------------------------------------------------------------------------------------------------------------------------------------------------------------------------------------------------------------------------------------------------------------------------------------------------------------------------------------------------------------------------------------------------------------------------------------------------------------------------------------------------------------------------------------------------------------------------------------------------------------------------------------------------------------------------------------------------------------------------------------------------------------------------------------------------------------------------------------------------------------------------------------------------------------------------------------------------------------------------------------------------------------------------------------------------------------------------------------|
| 9 chr7   | q34           | 141766883 | 141792094 | 6 0.000000  | -0.861591 | 7,12E-18 MGAM                                                                              | omimGene:154360                                           | CNV_3706, CNV_64964, CNV_64965, CNV_53811, CNV_31393, CNV_53904, CNV_30265, CNV_9586, CNV_10212, CNV_37566, CNV_52111, CNV_52112, CNV_52113, CNV_53831, CNV_53845, CNV_54002, CNV_52114, CNV_7607, CNV_36626, CNV_52115, CNV_52116, CNV_52117, CNV_112000, CNV_59387, CNV_103758, CNV_32953, CNV_37997, CNV_1744, CNV_10211, CNV_30264, CNV_52118, CNV_52119, CNV_52120, CNV_52121, CNV_52122, CNV_53977, CNV_54016, CNV_52123, CNV_52124, CNV_52125, CNV_52126, CNV_36627, CNV_52127, CNV_31394                                                                                                                                                                                                                                                                                                                                                                                                                                                                                                                                                                                                                                                                                                                                                                                                                                                                                                                                                                                                                                                                                                                                                                   |
| 10 chr7  | q36.2 - q36.3 | 154682564 | 155100335 | 72 0.476541 | 0.000000  | 1,01E-69 DPP6,<br>LOC10013270<br>7, PAXIP1,<br>LOC202781,<br>HTR5A, INSIG1                 | omimMorbid:126141,<br>omimGene:601305,<br>omimGene:602055 | CNV_0111, CNV_52163, CNV_53472, CNV_32967, CNV_52164, CNV_64996, CNV_95012, CNV_62748, CNV_32968, CNV_2721, CNV_38667, CNV_103763, CNV_64997, CNV_95013, CNV_95015, CNV_31404, CNV_34450, CNV_52165, CNV_100189, CNV_100190, CNV_64998, CNV_64999, CNV_95016, CNV_1173, CNV_52166, CNV_62750, CNV_52167                                                                                                                                                                                                                                                                                                                                                                                                                                                                                                                                                                                                                                                                                                                                                                                                                                                                                                                                                                                                                                                                                                                                                                                                                                                                                                                                                            |
| 11 chr8  | p11.22        | 39234992  | 39386158  | 28 0.614904 | 0.000000  | 2,80E-43 ADAM5P,<br>ADAM3A                                                                 |                                                           | CNV_2749, CNV_36815, CNV_105114, CNV_112161, CNV_59473, CNV_36816, CNV_105798, CNV_65114, CNV_106294, CNV_37462, CNV_7683, CNV_82574, CNV_95380, CNV_106595, CNV_31439, CNV_1779, CNV_103790, CNV_106668, CNV_33030, CNV_38096, CNV_1462, CNV_107920, CNV_3728, CNV_1197, CNV_1463, CNV_1198, CNV_112162, CNV_1460, CNV_1199, CNV_1200, CNV_1461, CNV_1465, CNV_95381, CNV_1464, CNV_112166                                                                                                                                                                                                                                                                                                                                                                                                                                                                                                                                                                                                                                                                                                                                                                                                                                                                                                                                                                                                                                                                                                                                                                                                                                                                        |
| 12 chr14 | q11.2         | 19376762  | 20420849  | 35 0.000000 | -0.523435 | 2,92E-40 OR11H12,<br>POTEG, P704P,<br>OR4Q3,<br>OR4M1,<br>OR4N2,<br>OR4K2,<br>OR4K5, OR4K1 |                                                           | CNV_7028, CNV_58655, CNV_76530, CNV_87085, CNV_31953, CNV_71830, CNV_71837, CNV_87086, CNV_87087, CNV_113648, CNV_71851, CNV_71863, CNV_38838, CNV_113649, CNV_71840, CNV_76531, CNV_87088, CNV_37153, CNV_2174, CNV_110092, CNV_71850, CNV_76533, CNV_87091, CNV_87092, CNV_87093, CNV_113650, CNV_106643, CNV_106171, CNV_0812, CNV_2256, CNV_4822, CNV_71852, CNV_4823, CNV_71839, CNV_76534, CNV_76535, CNV_87095, CNV_87096, CNV_76536, CNV_3929, CNV_37621, CNV_71853, CNV_71841, CNV_37154, CNV_106382, CNV_30646, CNV_76537, CNV_76539, CNV_87097, CNV_87098, CNV_71836, CNV_71861, CNV_71833, CNV_71844, CNV_30647, CNV_106383, CNV_76541, CNV_113651, CNV_71854, CNV_76542, CNV_87099, CNV_87102, CNV_87103, CNV_76543, CNV_87104, CNV_87101, CNV_71838, CNV_76544, CNV_76545, CNV_71855, CNV_106384, CNV_87100, CNV_71856, CNV_76546, CNV_87105, CNV_87106, CNV_76547, CNV_76548, CNV_76549, CNV_87107, CNV_71857, CNV_71835, CNV_76550, CNV_87108, CNV_87109, CNV_76552, CNV_87110, CNV_4824, CNV_113652, CNV_71858, CNV_4825, CNV_71842, CNV_76551, CNV_87111, CNV_76553, CNV_76554, CNV_87112, CNV_87114, CNV_87115, CNV_66584, CNV_30648, CNV_87116, CNV_76557, CNV_71832, CNV_106385, CNV_87117, CNV_0316, CNV_71859, CNV_113654, CNV_113655, CNV_38951, CNV_104041, CNV_87118, CNV_3036, CNV_8762, CNV_8763, CNV_8765, CNV_9234, CNV_34547, CNV_34575, CNV_34656, CNV_34660, CNV_34664, CNV_4826, CNV_34659, CNV_8764, CNV_9235, CNV_71831, CNV_71834, CNV_34563, CNV_76556, CNV_71860, CNV_87113, CNV_49301, CNV_49302, CNV_49303, CNV_49304, CNV_76555, CNV_76558, CNV_101886, CNV_101887, CNV_4827, CNV_2175, CNV_66583, CNV_76559, CNV_101888 |

|          |               |           |           |              |            |           |                                                                          |                   |                                                                                                                                                                                                                                                                                                                                                                                                                                                                                                                                                                                                                                                                                                                                                                                                                                                                                                                                                                                                                                                                                                                                                                                                                                                                                                                                                                                                                                                                                                                                                                                                                                                                                  |
|----------|---------------|-----------|-----------|--------------|------------|-----------|--------------------------------------------------------------------------|-------------------|----------------------------------------------------------------------------------------------------------------------------------------------------------------------------------------------------------------------------------------------------------------------------------------------------------------------------------------------------------------------------------------------------------------------------------------------------------------------------------------------------------------------------------------------------------------------------------------------------------------------------------------------------------------------------------------------------------------------------------------------------------------------------------------------------------------------------------------------------------------------------------------------------------------------------------------------------------------------------------------------------------------------------------------------------------------------------------------------------------------------------------------------------------------------------------------------------------------------------------------------------------------------------------------------------------------------------------------------------------------------------------------------------------------------------------------------------------------------------------------------------------------------------------------------------------------------------------------------------------------------------------------------------------------------------------|
| 13 chr14 | q32.33        | 106875948 | 106931193 | 12 0.000000  | -0.751217  | 2,01E-26  |                                                                          |                   | CNV_10460, CNV_7026, CNV_113813, CNV_35213, CNV_0317, CNV_35219, CNV_35220, CNV_22954, CNV_7027, CNV_1956, CNV_76774, CNV_87415, CNV_72030, CNV_4856, CNV_113829, CNV_72017, CNV_0182, CNV_72049, CNV_72044, CNV_5322, CNV_87418, CNV_4857, CNV_35234, CNV_72010, CNV_102035, CNV_76777, CNV_113836, CNV_72037, CNV_108102, CNV_113862, CNV_72081, CNV_72008, CNV_106381, CNV_87416, CNV_22914, CNV_59724, CNV_23308, CNV_87412, CNV_76778, CNV_113816, CNV_71999, CNV_76779, CNV_76780, CNV_87423, CNV_87424, CNV_87425, CNV_4858, CNV_9735, CNV_9736, CNV_9739, CNV_10455, CNV_10456, CNV_10458, CNV_10459, CNV_49296, CNV_49297, CNV_49298, CNV_53475, CNV_53711, CNV_53925, CNV_53949, CNV_53956, CNV_53963                                                                                                                                                                                                                                                                                                                                                                                                                                                                                                                                                                                                                                                                                                                                                                                                                                                                                                                                                                  |
| 14 chr15 | q11.1 - q11.2 | 20571586  | 22173977  | 56 0.322088  | 0.000000   | 3,67E-24  | GOLGA6L6,<br>GOLGA8C,<br>BCL8, POTE8,<br>NF1P1,<br>LOC646214,<br>CXADRP2 | omimGene:601889   | CNV_3951, CNV_3070, CNV_49466, CNV_49467, CNV_49468, CNV_49469, CNV_49470, CNV_49471, CNV_8779, CNV_8780, CNV_8781, CNV_8784, CNV_9251, CNV_34504, CNV_34562, CNV_34576, CNV_9250, CNV_9253, CNV_34608, CNV_34665, CNV_31980, CNV_30670, CNV_76794, CNV_87446, CNV_35284, CNV_0318, CNV_72097, CNV_87450, CNV_105467, CNV_113869, CNV_7046, CNV_34663, CNV_72116, CNV_76802, CNV_37625, CNV_87451, CNV_113870, CNV_0776, CNV_2181, CNV_58702, CNV_72112, CNV_76795, CNV_87443, CNV_35291, CNV_72115, CNV_106392, CNV_113871, CNV_38976, CNV_106645, CNV_76804, CNV_87445, CNV_87453, CNV_35292, CNV_0442, CNV_35293, CNV_72092, CNV_102039, CNV_108468, CNV_23174, CNV_72114, CNV_76805, CNV_76806, CNV_22641, CNV_1957, CNV_39159, CNV_9255, CNV_0443, CNV_0444, CNV_110096, CNV_72111, CNV_4865, CNV_72123, CNV_4866, CNV_72124, CNV_66724, CNV_72142, CNV_76807, CNV_87454, CNV_72143, CNV_72125, CNV_87455, CNV_4867, CNV_87456, CNV_76808, CNV_72126, CNV_72127, CNV_59597, CNV_113872, CNV_34545, CNV_8785, CNV_9254, CNV_72128, CNV_8783, CNV_23136, CNV_113877, CNV_0775, CNV_2180, CNV_4870, CNV_76809, CNV_87457, CNV_87458, CNV_76810, CNV_108479, CNV_9256, CNV_76811, CNV_87459, CNV_87460, CNV_76812, CNV_4871, CNV_76814, CNV_76818, CNV_87462, CNV_87465, CNV_87466, CNV_34607, CNV_72130, CNV_102040, CNV_102041, CNV_72129, CNV_102042, CNV_102043, CNV_9742, CNV_102044, CNV_72121, CNV_113876, CNV_63050, CNV_113874, CNV_113873, CNV_72122, CNV_72141, CNV_113878, CNV_8786, CNV_72120, CNV_72132, CNV_72139, CNV_4863, CNV_72140, CNV_72133, CNV_72134, CNV_87467, CNV_87468, CNV_72135, CNV_72144, CNV_72119, CNV_76815, CNV_72137, CNV_106393, CNV_59725 |
| 15 chr15 | q22.2         | 60800311  | 61056864  | 60 0.659282  | 0.000000   | 3,23E-111 | RORA                                                                     | omimGene:600825   | CNV_113955                                                                                                                                                                                                                                                                                                                                                                                                                                                                                                                                                                                                                                                                                                                                                                                                                                                                                                                                                                                                                                                                                                                                                                                                                                                                                                                                                                                                                                                                                                                                                                                                                                                                       |
| 16 chr20 | p13           | 1563715   | 1577359   | 4 0.000000   | -2.136.494 | 5,49E-33  | SIRPB1                                                                   |                   | CNV_4090, CNV_35897, CNV_35898, CNV_0536, CNV_35899, CNV_104442, CNV_114874, CNV_67634, CNV_35900, CNV_104187, CNV_35901, CNV_35902, CNV_35903, CNV_35904, CNV_1522, CNV_7297, CNV_79098, CNV_79099, CNV_90432, CNV_90433, CNV_35905, CNV_110389, CNV_22910, CNV_61903, CNV_107995, CNV_37839, CNV_102897, CNV_90434, CNV_114876, CNV_31029, CNV_32405, CNV_1992, CNV_90435                                                                                                                                                                                                                                                                                                                                                                                                                                                                                                                                                                                                                                                                                                                                                                                                                                                                                                                                                                                                                                                                                                                                                                                                                                                                                                      |
| 17 chr21 | q22.3         | 45439340  | 45623174  | 42 0.447925  | 0.000000   | 2,36E-35  | TRAPPC10,<br>PWP2,<br>C21orf33                                           |                   | CNV_7327, CNV_59777, CNV_110451, CNV_103107, CNV_67804, CNV_104492, CNV_43382                                                                                                                                                                                                                                                                                                                                                                                                                                                                                                                                                                                                                                                                                                                                                                                                                                                                                                                                                                                                                                                                                                                                                                                                                                                                                                                                                                                                                                                                                                                                                                                                    |
| 18 chrX  | p22.33        | 81548     | 92387     | 4 0.000000   | -1.150.246 | 8,39E-22  |                                                                          |                   | CNV_73882, CNV_83235, CNV_83236, CNV_96362, CNV_73883, CNV_96363                                                                                                                                                                                                                                                                                                                                                                                                                                                                                                                                                                                                                                                                                                                                                                                                                                                                                                                                                                                                                                                                                                                                                                                                                                                                                                                                                                                                                                                                                                                                                                                                                 |
| 19 chrX  | p21.1         | 31986625  | 32863006  | 188 0.000000 | -1.096.913 | 0.000     | DMD                                                                      | omimMorbid:300377 | CNV_52980, CNV_73952, CNV_52981, CNV_1845, CNV_67956                                                                                                                                                                                                                                                                                                                                                                                                                                                                                                                                                                                                                                                                                                                                                                                                                                                                                                                                                                                                                                                                                                                                                                                                                                                                                                                                                                                                                                                                                                                                                                                                                             |
| 20 chrX  | p21.1         | 32279743  | 32344451  | 14 0.000000  | -4.563.121 | 1,14E-139 | DMD                                                                      | omimMorbid:300377 | CNV_52980                                                                                                                                                                                                                                                                                                                                                                                                                                                                                                                                                                                                                                                                                                                                                                                                                                                                                                                                                                                                                                                                                                                                                                                                                                                                                                                                                                                                                                                                                                                                                                                                                                                                        |

|                             |         |               |           |           |    |          |            |           |                  |                                                                                                                                                                                                                                                                                                                                                            |                                                                                                                                                                                                                                                                                                                                                                                                                                                                                                                                                                                                                                                                                                                                                                                                                                                                                                                                                                                                                                                                                                                                                                                                                                                                                                                                                                                                                                                                                                                          |
|-----------------------------|---------|---------------|-----------|-----------|----|----------|------------|-----------|------------------|------------------------------------------------------------------------------------------------------------------------------------------------------------------------------------------------------------------------------------------------------------------------------------------------------------------------------------------------------------|--------------------------------------------------------------------------------------------------------------------------------------------------------------------------------------------------------------------------------------------------------------------------------------------------------------------------------------------------------------------------------------------------------------------------------------------------------------------------------------------------------------------------------------------------------------------------------------------------------------------------------------------------------------------------------------------------------------------------------------------------------------------------------------------------------------------------------------------------------------------------------------------------------------------------------------------------------------------------------------------------------------------------------------------------------------------------------------------------------------------------------------------------------------------------------------------------------------------------------------------------------------------------------------------------------------------------------------------------------------------------------------------------------------------------------------------------------------------------------------------------------------------------|
| C2_ihg2016_252185028566_1_1 | 21 chrY | p11.32        | 31548     | 42387     | 4  | 0.000000 | -1.150.246 | 8,39E-22  |                  | CNV_83894, CNV_97143                                                                                                                                                                                                                                                                                                                                       |                                                                                                                                                                                                                                                                                                                                                                                                                                                                                                                                                                                                                                                                                                                                                                                                                                                                                                                                                                                                                                                                                                                                                                                                                                                                                                                                                                                                                                                                                                                          |
|                             | 22 chr1 | p31.2         | 69289409  | 69363038  | 6  | 0.000000 | -0.969409  | 1,86E-21  |                  | CNV_4229, CNV_0383, CNV_34829, CNV_3293, CNV_34830, CNV_34831, CNV_34832, CNV_34833, CNV_74531, CNV_74532, CNV_84304, CNV_105572, CNV_23231, CNV_97396, CNV_60842, CNV_103487, CNV_22923, CNV_58405, CNV_104750, CNV_111188, CNV_43688, CNV_64030, CNV_6832, CNV_30388, CNV_31627, CNV_1005, CNV_1006, CNV_1543, CNV_37834, CNV_1009, CNV_84305, CNV_74533 |                                                                                                                                                                                                                                                                                                                                                                                                                                                                                                                                                                                                                                                                                                                                                                                                                                                                                                                                                                                                                                                                                                                                                                                                                                                                                                                                                                                                                                                                                                                          |
|                             | 23 chr1 | p31.1         | 72768855  | 72795480  | 5  | 0.000000 | -3.500.261 | 3,72E-64  |                  |                                                                                                                                                                                                                                                                                                                                                            |                                                                                                                                                                                                                                                                                                                                                                                                                                                                                                                                                                                                                                                                                                                                                                                                                                                                                                                                                                                                                                                                                                                                                                                                                                                                                                                                                                                                                                                                                                                          |
|                             | 24 chr1 | q21.3         | 152569857 | 152581944 | 5  | 0.000000 | -1.823.880 | 9,45E-48  | LCE3C            | omimGene:612615                                                                                                                                                                                                                                                                                                                                            | CNV_8333, CNV_3314, CNV_53646, CNV_34711, CNV_34712, CNV_0393, CNV_34713, CNV_6786, CNV_74715, CNV_97511, CNV_84576, CNV_107201, CNV_22907, CNV_1558, CNV_103653, CNV_23222, CNV_105006, CNV_112109, CNV_37400, CNV_64960, CNV_38795, CNV_30438, CNV_31661, CNV_38961, CNV_84577, CNV_74714, CNV_1018, CNV_31662                                                                                                                                                                                                                                                                                                                                                                                                                                                                                                                                                                                                                                                                                                                                                                                                                                                                                                                                                                                                                                                                                                                                                                                                         |
|                             | 25 chr2 | p11.2 - p11.1 | 89456779  | 91766271  | 39 | 0.000000 | -0.753662  | 6,31E-85  |                  |                                                                                                                                                                                                                                                                                                                                                            | CNV_34427, CNV_35873, CNV_107994, CNV_115389, CNV_104585, CNV_74122, CNV_59010, CNV_74104, CNV_34620, CNV_115397, CNV_74105, CNV_23246, CNV_4296, CNV_115405, CNV_78647, CNV_89796, CNV_74119, CNV_115399, CNV_7287, CNV_35877, CNV_74116, CNV_89797, CNV_89798, CNV_7288, CNV_89799, CNV_89800, CNV_89801, CNV_74109, CNV_4297, CNV_74103, CNV_104587, CNV_74117, CNV_104588, CNV_115406, CNV_78648, CNV_89802, CNV_89803, CNV_78649, CNV_78650, CNV_89804, CNV_2057, CNV_74126, CNV_74137, CNV_74127, CNV_115408, CNV_74125, CNV_74139, CNV_59011, CNV_104589, CNV_115410, CNV_37972, CNV_104236, CNV_2058, CNV_9954, CNV_50591, CNV_50592, CNV_1591, CNV_74138, CNV_68084, CNV_74128, CNV_78651, CNV_78652, CNV_89805, CNV_89806, CNV_78653, CNV_89807, CNV_89808, CNV_74129, CNV_4298, CNV_9956, CNV_50596, CNV_50597, CNV_50598, CNV_115409, CNV_78656, CNV_1353, CNV_59607, CNV_78654, CNV_74136, CNV_74141, CNV_74130, CNV_59012, CNV_78655, CNV_74131, CNV_74135, CNV_104590, CNV_89809, CNV_89810, CNV_23275, CNV_74140, CNV_68083, CNV_35878, CNV_1355, CNV_1354, CNV_9957, CNV_53731, CNV_35879, CNV_35880, CNV_59013, CNV_74132, CNV_35881, CNV_74133, CNV_30966, CNV_74134, CNV_3375, CNV_74142, CNV_97916, CNV_63132, CNV_22848, CNV_63181, CNV_115411, CNV_32325, CNV_32326, CNV_61793, CNV_23041, CNV_22637, CNV_74143, CNV_30967, CNV_35882, CNV_74147, CNV_74148, CNV_30968, CNV_74149, CNV_35883, CNV_30969, CNV_32327, CNV_35884, CNV_0527, CNV_35885, CNV_44038, CNV_115412, CNV_115413, CNV_115414 |
|                             | 26 chr3 | q26.1         | 162514534 | 162619141 | 10 | 0.000000 | -3.802.632 | 3,73E-168 |                  |                                                                                                                                                                                                                                                                                                                                                            | CNV_30185, CNV_4359, CNV_3461, CNV_36095, CNV_0563, CNV_36096, CNV_98511, CNV_43698, CNV_63640, CNV_63641, CNV_104707, CNV_107837, CNV_110712, CNV_79986, CNV_91670, CNV_38805, CNV_103484, CNV_1649, CNV_107609, CNV_31126, CNV_7377, CNV_38965, CNV_32529, CNV_59583, CNV_59584, CNV_59608, CNV_91671, CNV_91672, CNV_110135, CNV_110510, CNV_4360, CNV_110136, CNV_1377, CNV_23278, CNV_59901, CNV_107999, CNV_110714, CNV_4361                                                                                                                                                                                                                                                                                                                                                                                                                                                                                                                                                                                                                                                                                                                                                                                                                                                                                                                                                                                                                                                                                       |
|                             | 27 chr4 | q13.2         | 69387056  | 69483277  | 12 | 0.582679 | 0.000000   | 3,35E-15  | UGT2B17, UGT2B15 | omimMorbid:601903                                                                                                                                                                                                                                                                                                                                          | CNV_3499, CNV_92177, CNV_38138, CNV_104781, CNV_110895, CNV_92178, CNV_106520, CNV_63852, CNV_31177, CNV_7448, CNV_23279, CNV_103525, CNV_38966, CNV_110896, CNV_110897, CNV_92179, CNV_1082, CNV_1083, CNV_1388, CNV_1389, CNV_110898, CNV_1390, CNV_1084, CNV_1085, CNV_1391, CNV_1392, CNV_63853, CNV_106521, CNV_92180, CNV_110900, CNV_110901, CNV_92181, CNV_106522, CNV_1087                                                                                                                                                                                                                                                                                                                                                                                                                                                                                                                                                                                                                                                                                                                                                                                                                                                                                                                                                                                                                                                                                                                                      |



|          |        |           |           |    |                    |                                                                         |                 |                                                                                                                                                                                                                                                                                                                                                                                                                                                                                                                                                                                                                                                                                                                                                                                                                                                                                                                                                                                                                                                                                                                                                                                                                                                                                                                                                                                                                                                                                                                                                                                                                                                                    |
|----------|--------|-----------|-----------|----|--------------------|-------------------------------------------------------------------------|-----------------|--------------------------------------------------------------------------------------------------------------------------------------------------------------------------------------------------------------------------------------------------------------------------------------------------------------------------------------------------------------------------------------------------------------------------------------------------------------------------------------------------------------------------------------------------------------------------------------------------------------------------------------------------------------------------------------------------------------------------------------------------------------------------------------------------------------------------------------------------------------------------------------------------------------------------------------------------------------------------------------------------------------------------------------------------------------------------------------------------------------------------------------------------------------------------------------------------------------------------------------------------------------------------------------------------------------------------------------------------------------------------------------------------------------------------------------------------------------------------------------------------------------------------------------------------------------------------------------------------------------------------------------------------------------------|
| 28 chr6  | p21.32 | 32455274  | 32493043  | 5  | 1.428.077 0.000000 | 2,89E-23 HLA-DRB5                                                       | omimGene:604776 | CNV_3603, CNV_4493, CNV_64476, CNV_7567, CNV_37840, CNV_69469, CNV_69421, CNV_69472, CNV_31280, CNV_4767, CNV_111517, CNV_107632, CNV_111516, CNV_111496, CNV_81335, CNV_81336, CNV_81340, CNV_81342, CNV_81343, CNV_93642, CNV_93646, CNV_103651, CNV_23237, CNV_111505, CNV_111527, CNV_69411, CNV_69414, CNV_32790, CNV_111524, CNV_59326, CNV_37538, CNV_69427, CNV_69442, CNV_69416, CNV_81337, CNV_93647, CNV_69443, CNV_38969, CNV_81344, CNV_111507, CNV_111495, CNV_111529, CNV_69438, CNV_32791, CNV_111531, CNV_69444, CNV_69440, CNV_63176, CNV_69458, CNV_111503, CNV_106274                                                                                                                                                                                                                                                                                                                                                                                                                                                                                                                                                                                                                                                                                                                                                                                                                                                                                                                                                                                                                                                                          |
| 29 chr7  | q33    | 133589546 | 133703003 | 20 | 0.567940           | 1,02E-24 EXOC4                                                          | omimGene:608185 | CNV_3704                                                                                                                                                                                                                                                                                                                                                                                                                                                                                                                                                                                                                                                                                                                                                                                                                                                                                                                                                                                                                                                                                                                                                                                                                                                                                                                                                                                                                                                                                                                                                                                                                                                           |
| 30 chr7  | q34    | 141766883 | 141792094 | 6  | 0.000000           | 3,10E-20 MGAM                                                           | omimGene:154360 | CNV_3706, CNV_64964, CNV_64965, CNV_53811, CNV_31393, CNV_53904, CNV_30265, CNV_9586, CNV_10212, CNV_37566, CNV_52111, CNV_52112, CNV_52113, CNV_53831, CNV_53845, CNV_54002, CNV_52114, CNV_7607, CNV_36626, CNV_52115, CNV_52116, CNV_52117, CNV_112000, CNV_59387, CNV_103758, CNV_32953, CNV_37997, CNV_1744, CNV_10211, CNV_30264, CNV_52118, CNV_52119, CNV_52120, CNV_52121, CNV_52122, CNV_53977, CNV_54016, CNV_52123, CNV_52124, CNV_52125, CNV_52126, CNV_36627, CNV_52127, CNV_31394                                                                                                                                                                                                                                                                                                                                                                                                                                                                                                                                                                                                                                                                                                                                                                                                                                                                                                                                                                                                                                                                                                                                                                   |
| 31 chr8  | p11.22 | 39234992  | 39386158  | 28 | 0.645703           | 5,71E-45 ADAM5P, ADAM3A                                                 |                 | CNV_2749, CNV_36815, CNV_105114, CNV_112161, CNV_59473, CNV_36816, CNV_105798, CNV_65114, CNV_106294, CNV_37462, CNV_7683, CNV_82574, CNV_95380, CNV_106595, CNV_31439, CNV_1779, CNV_103790, CNV_106668, CNV_33030, CNV_38096, CNV_1462, CNV_107920, CNV_3728, CNV_1197, CNV_1463, CNV_1198, CNV_112162, CNV_1460, CNV_1199, CNV_1200, CNV_1461, CNV_1465, CNV_95381, CNV_1464, CNV_112166                                                                                                                                                                                                                                                                                                                                                                                                                                                                                                                                                                                                                                                                                                                                                                                                                                                                                                                                                                                                                                                                                                                                                                                                                                                                        |
| 32 chr14 | q11.2  | 19376762  | 20420849  | 35 | 0.000000           | 9,47E-44 OR11H12, POTE, P704P, OR4Q3, OR4M1, OR4N2, OR4K2, OR4K5, OR4K1 |                 | CNV_7028, CNV_58655, CNV_76530, CNV_87085, CNV_31953, CNV_71830, CNV_71837, CNV_87086, CNV_87087, CNV_113648, CNV_71851, CNV_71863, CNV_38838, CNV_113649, CNV_71840, CNV_76531, CNV_87088, CNV_37153, CNV_2174, CNV_110092, CNV_71850, CNV_76533, CNV_87091, CNV_87092, CNV_87093, CNV_113650, CNV_106643, CNV_106171, CNV_0812, CNV_2256, CNV_4822, CNV_71852, CNV_4823, CNV_71839, CNV_76534, CNV_76535, CNV_87095, CNV_87096, CNV_76536, CNV_3929, CNV_37621, CNV_71853, CNV_71841, CNV_37154, CNV_106382, CNV_30646, CNV_76537, CNV_76539, CNV_87097, CNV_87098, CNV_71836, CNV_71861, CNV_71833, CNV_71844, CNV_30647, CNV_106383, CNV_76541, CNV_113651, CNV_71854, CNV_76542, CNV_87099, CNV_87102, CNV_87103, CNV_76543, CNV_87104, CNV_87101, CNV_71838, CNV_76544, CNV_76545, CNV_71855, CNV_106384, CNV_87100, CNV_71856, CNV_76546, CNV_87105, CNV_87106, CNV_76547, CNV_76548, CNV_76549, CNV_87107, CNV_71857, CNV_71835, CNV_76550, CNV_87108, CNV_87109, CNV_76552, CNV_87110, CNV_4824, CNV_113652, CNV_71858, CNV_4825, CNV_71842, CNV_76551, CNV_87111, CNV_76553, CNV_76554, CNV_87112, CNV_87114, CNV_87115, CNV_66584, CNV_30648, CNV_87116, CNV_76557, CNV_71832, CNV_106385, CNV_87117, CNV_0316, CNV_71859, CNV_113654, CNV_113655, CNV_38951, CNV_104041, CNV_87118, CNV_3036, CNV_8762, CNV_8763, CNV_8765, CNV_9234, CNV_34547, CNV_34575, CNV_34656, CNV_34660, CNV_34664, CNV_4826, CNV_34659, CNV_8764, CNV_9235, CNV_71831, CNV_71834, CNV_34563, CNV_76556, CNV_71860, CNV_87113, CNV_49301, CNV_49302, CNV_49303, CNV_49304, CNV_76555, CNV_76558, CNV_101886, CNV_101887, CNV_4827, CNV_2175, CNV_66583, CNV_76559, CNV_101888 |

|                             |                |           |           |              |            |            |                                                                                                                                                                                                                                                                                                                                                                      |                                                                                                                                                             |                                                                                                                                                                                                                                                                                                                                                                                                                                                        |
|-----------------------------|----------------|-----------|-----------|--------------|------------|------------|----------------------------------------------------------------------------------------------------------------------------------------------------------------------------------------------------------------------------------------------------------------------------------------------------------------------------------------------------------------------|-------------------------------------------------------------------------------------------------------------------------------------------------------------|--------------------------------------------------------------------------------------------------------------------------------------------------------------------------------------------------------------------------------------------------------------------------------------------------------------------------------------------------------------------------------------------------------------------------------------------------------|
| 33 chr14                    | q32.33         | 106875948 | 106917229 | 9 0.000000   | -0.925531  | 1,67E-20   |                                                                                                                                                                                                                                                                                                                                                                      |                                                                                                                                                             | CNV_10460, CNV_7026, CNV_113813, CNV_35213, CNV_0317, CNV_35219, CNV_35220, CNV_22954, CNV_7027, CNV_1956, CNV_76774, CNV_87415, CNV_72030, CNV_4856, CNV_113829, CNV_72017, CNV_0182, CNV_72049, CNV_72044, CNV_5322, CNV_87418, CNV_4857, CNV_35234, CNV_72010, CNV_102035, CNV_76777, CNV_113836, CNV_72037, CNV_108102, CNV_113862, CNV_72081, CNV_72008, CNV_106381, CNV_87416, CNV_22914, CNV_59724, CNV_23308, CNV_87412, CNV_76778, CNV_113816 |
| 34 chr15                    | q22.2          | 60800311  | 61066895  | 62 0.654805  | 0.000000   | 9,55E-105  | RORA                                                                                                                                                                                                                                                                                                                                                                 | omimGene:600825                                                                                                                                             | CNV_113955                                                                                                                                                                                                                                                                                                                                                                                                                                             |
| 35 chr20                    | p13            | 1563715   | 1577359   | 4 0.000000   | -1.852.324 | 5,16E-30   | SIRPB1                                                                                                                                                                                                                                                                                                                                                               |                                                                                                                                                             | CNV_4090, CNV_35897, CNV_35898, CNV_0536, CNV_35899, CNV_104442, CNV_114874, CNV_67634, CNV_35900, CNV_104187, CNV_35901, CNV_35902, CNV_35903, CNV_35904, CNV_1522, CNV_7297, CNV_79098, CNV_79099, CNV_90432, CNV_90433, CNV_35905, CNV_110389, CNV_22910, CNV_61903, CNV_107995, CNV_37839, CNV_102897, CNV_90434, CNV_114876, CNV_31029, CNV_32405, CNV_1992, CNV_90435                                                                            |
| 36 chr21                    | q22.3          | 45436248  | 45623174  | 43 0.413437  | 0.000000   | 2,64E-28   | TRAPPC10,<br>PWP2,<br>C21orf33                                                                                                                                                                                                                                                                                                                                       |                                                                                                                                                             | CNV_7327, CNV_59777, CNV_110451, CNV_103107, CNV_67804, CNV_104492, CNV_43382                                                                                                                                                                                                                                                                                                                                                                          |
| 37 chrX                     | p22.33         | 81548     | 92387     | 4 0.000000   | -1.153.265 | 3,40E-20   |                                                                                                                                                                                                                                                                                                                                                                      |                                                                                                                                                             | CNV_73882, CNV_83235, CNV_83236, CNV_96362, CNV_73883, CNV_96363                                                                                                                                                                                                                                                                                                                                                                                       |
| 38 chrX                     | p21.1          | 31986625  | 32863006  | 188 0.000000 | -1.107.216 | 0.000      | DMD                                                                                                                                                                                                                                                                                                                                                                  | omimMorbid:300377                                                                                                                                           | CNV_52980, CNV_73952, CNV_52981, CNV_1845, CNV_67956                                                                                                                                                                                                                                                                                                                                                                                                   |
| 39 chrX                     | p21.1          | 32279743  | 32344451  | 14 0.000000  | -4.606.299 | 5,67E-145  | DMD                                                                                                                                                                                                                                                                                                                                                                  | omimMorbid:300377                                                                                                                                           | CNV_52980                                                                                                                                                                                                                                                                                                                                                                                                                                              |
| 40 chrY                     | p11.32         | 31548     | 42387     | 4 0.000000   | -1.153.265 | 3,40E-20   |                                                                                                                                                                                                                                                                                                                                                                      |                                                                                                                                                             | CNV_83894, CNV_97143                                                                                                                                                                                                                                                                                                                                                                                                                                   |
| 41 chrY                     | p11.31 - p11.2 | 2700469   | 9940379   | 396 0.419644 | 0.000000   | 5,64E-92   | RPS4Y1, ZFY,<br>TGIF2LY,<br>PCDH11Y,<br>LOC10010112<br>1, TTTY23,<br>TSPY2,<br>LOC10010111<br>6, TTTY1,<br>TTY2,<br>LOC10010111<br>7, TTTY21,<br>LOC10010111<br>5, TTTY7,<br>TTY7B,<br>TTY8,<br>TTY8B,<br>AMELY, TBL1Y,<br>PRKY, TTTY16,<br>TTY12,<br>TTY18,<br>TTY19,<br>TTY11,<br>RBM1A3P,<br>TTY20,<br>FAM197Y2,<br>TSPY4, TSPY3,<br>TSPY1,<br>RBM1A3AP,<br>TTY22 | omimGene:470000,<br>omimGene:490000,<br>omimGene:400025,<br>omimGene:400022,<br>omimGene:410000,<br>omimGene:400033,<br>omimGene:400008,<br>omimGene:480100 | CNV_31579, CNV_59553, CNV_97163, CNV_4179, CNV_2283, CNV_97165, CNV_2284, CNV_33189, CNV_31580, CNV_83912, CNV_97166, CNV_31581, CNV_31582, CNV_97167, CNV_97169, CNV_37073, CNV_37829, CNV_83913, CNV_97170, CNV_97171, CNV_83914, CNV_97172, CNV_97173, CNV_4180, CNV_83915, CNV_97174, CNV_0829, CNV_2285, CNV_37074, CNV_33191, CNV_83916, CNV_97175, CNV_83917, CNV_31584, CNV_4182, CNV_59885, CNV_97176                                         |
| C1_ihg2016_252185028565_1_2 | 42 chr1        | p31.2     | 69289409  | 69363038     | 6 0.000000 | -1.003.069 | 2,33E-24                                                                                                                                                                                                                                                                                                                                                             |                                                                                                                                                             |                                                                                                                                                                                                                                                                                                                                                                                                                                                        |

|         |               |           |           |             |            |           |                  |                                                                                                                                                                                                                                                                                                                                                            |                                                                                                                                                                                                                                                                                                                                                                                                                                                                                                                                                                                                                                                                                                                                                                                                                                                                                                                                                                                                                                                                                                                                                                                                                                                                                                                                                                                                                                                                                                                                     |
|---------|---------------|-----------|-----------|-------------|------------|-----------|------------------|------------------------------------------------------------------------------------------------------------------------------------------------------------------------------------------------------------------------------------------------------------------------------------------------------------------------------------------------------------|-------------------------------------------------------------------------------------------------------------------------------------------------------------------------------------------------------------------------------------------------------------------------------------------------------------------------------------------------------------------------------------------------------------------------------------------------------------------------------------------------------------------------------------------------------------------------------------------------------------------------------------------------------------------------------------------------------------------------------------------------------------------------------------------------------------------------------------------------------------------------------------------------------------------------------------------------------------------------------------------------------------------------------------------------------------------------------------------------------------------------------------------------------------------------------------------------------------------------------------------------------------------------------------------------------------------------------------------------------------------------------------------------------------------------------------------------------------------------------------------------------------------------------------|
| 43 chr1 | p31.1         | 72768855  | 72795480  | 5 0.000000  | -3.752.135 | 3,44E-66  |                  | CNV_4229, CNV_0383, CNV_34829, CNV_3293, CNV_34830, CNV_34831, CNV_34832, CNV_34833, CNV_74531, CNV_74532, CNV_84304, CNV_105572, CNV_23231, CNV_97396, CNV_60842, CNV_103487, CNV_22923, CNV_58405, CNV_104750, CNV_111188, CNV_43688, CNV_64030, CNV_6832, CNV_30388, CNV_31627, CNV_1005, CNV_1006, CNV_1543, CNV_37834, CNV_1009, CNV_84305, CNV_74533 |                                                                                                                                                                                                                                                                                                                                                                                                                                                                                                                                                                                                                                                                                                                                                                                                                                                                                                                                                                                                                                                                                                                                                                                                                                                                                                                                                                                                                                                                                                                                     |
| 44 chr1 | q21.3         | 152569857 | 152581944 | 5 0.000000  | -1.756.018 | 6,54E-43  | LCE3C            | omimGene:612615                                                                                                                                                                                                                                                                                                                                            | CNV_8333, CNV_3314, CNV_53646, CNV_34711, CNV_34712, CNV_0393, CNV_34713, CNV_6786, CNV_74715, CNV_97511, CNV_84576, CNV_107201, CNV_22907, CNV_1558, CNV_103653, CNV_23222, CNV_105006, CNV_112109, CNV_37400, CNV_64960, CNV_38795, CNV_30438, CNV_31661, CNV_38961, CNV_84577, CNV_74714, CNV_1018, CNV_31662                                                                                                                                                                                                                                                                                                                                                                                                                                                                                                                                                                                                                                                                                                                                                                                                                                                                                                                                                                                                                                                                                                                                                                                                                    |
| 45 chr2 | p11.2 - p11.1 | 89441099  | 91766271  | 41 0.000000 | -0.650687  | 2,43E-78  |                  |                                                                                                                                                                                                                                                                                                                                                            | CNV_34427, CNV_35873, CNV_107994, CNV_35875, CNV_115389, CNV_104585, CNV_74122, CNV_59010, CNV_74104, CNV_34620, CNV_115397, CNV_74105, CNV_23246, CNV_4296, CNV_115405, CNV_78647, CNV_89796, CNV_74119, CNV_115399, CNV_7287, CNV_35877, CNV_74116, CNV_89797, CNV_89798, CNV_7288, CNV_89799, CNV_89800, CNV_89801, CNV_74109, CNV_4297, CNV_74103, CNV_104587, CNV_74117, CNV_104588, CNV_115406, CNV_78648, CNV_89802, CNV_89803, CNV_78649, CNV_78650, CNV_89804, CNV_2057, CNV_74126, CNV_74137, CNV_74127, CNV_115408, CNV_74125, CNV_74139, CNV_59011, CNV_104589, CNV_115410, CNV_37972, CNV_104236, CNV_2058, CNV_9954, CNV_50591, CNV_50592, CNV_1591, CNV_74138, CNV_68084, CNV_74128, CNV_78651, CNV_78652, CNV_89805, CNV_89806, CNV_78653, CNV_89807, CNV_89808, CNV_74129, CNV_4298, CNV_9956, CNV_50596, CNV_50597, CNV_50598, CNV_115409, CNV_78656, CNV_1353, CNV_59607, CNV_78654, CNV_74136, CNV_74141, CNV_74130, CNV_59012, CNV_78655, CNV_74131, CNV_74135, CNV_104590, CNV_89809, CNV_89810, CNV_23275, CNV_74140, CNV_68083, CNV_35878, CNV_1355, CNV_1354, CNV_9957, CNV_53731, CNV_35879, CNV_35880, CNV_59013, CNV_74132, CNV_35881, CNV_74133, CNV_30966, CNV_74134, CNV_3375, CNV_74142, CNV_97916, CNV_63132, CNV_22848, CNV_63181, CNV_115411, CNV_32325, CNV_32326, CNV_61793, CNV_23041, CNV_22637, CNV_74143, CNV_30967, CNV_35882, CNV_74147, CNV_74148, CNV_30968, CNV_74149, CNV_35883, CNV_30969, CNV_32327, CNV_35884, CNV_0527, CNV_35885, CNV_44038, CNV_115412, CNV_115413, CNV_115414 |
| 46 chr3 | q26.1         | 162514534 | 162619141 | 10 0.000000 | -3.454.784 | 1,89E-166 |                  |                                                                                                                                                                                                                                                                                                                                                            | CNV_30185, CNV_4359, CNV_3461, CNV_36095, CNV_0563, CNV_36096, CNV_98511, CNV_43698, CNV_63640, CNV_63641, CNV_104707, CNV_107837, CNV_110712, CNV_79986, CNV_91670, CNV_38805, CNV_103484, CNV_1649, CNV_107609, CNV_31126, CNV_7377, CNV_38965, CNV_32529, CNV_59583, CNV_59584, CNV_59608, CNV_91671, CNV_91672, CNV_110135, CNV_110510, CNV_4360, CNV_110136, CNV_1377, CNV_23278, CNV_59901, CNV_107999, CNV_110714, CNV_4361                                                                                                                                                                                                                                                                                                                                                                                                                                                                                                                                                                                                                                                                                                                                                                                                                                                                                                                                                                                                                                                                                                  |
| 47 chr4 | q13.2         | 69387056  | 69483277  | 12 0.537361 | 0.000000   | 8,57E-16  | UGT2B17, UGT2B15 | omimMorbid:601903                                                                                                                                                                                                                                                                                                                                          | CNV_3499, CNV_92177, CNV_38138, CNV_104781, CNV_110895, CNV_92178, CNV_106520, CNV_63852, CNV_31177, CNV_7448, CNV_23279, CNV_103525, CNV_38966, CNV_110896, CNV_110897, CNV_92179, CNV_1082, CNV_1083, CNV_1388, CNV_1389, CNV_110898, CNV_1390, CNV_1084, CNV_1085, CNV_1391, CNV_1392, CNV_63853, CNV_106521, CNV_92180, CNV_110900, CNV_110901, CNV_92181, CNV_106522, CNV_1087                                                                                                                                                                                                                                                                                                                                                                                                                                                                                                                                                                                                                                                                                                                                                                                                                                                                                                                                                                                                                                                                                                                                                 |

|         |        |           |           |    |           |           |          |                   |                 |                                                                                                                                                                                                                                                                                                                                                                                                                                                                                                                                                                                                                             |
|---------|--------|-----------|-----------|----|-----------|-----------|----------|-------------------|-----------------|-----------------------------------------------------------------------------------------------------------------------------------------------------------------------------------------------------------------------------------------------------------------------------------------------------------------------------------------------------------------------------------------------------------------------------------------------------------------------------------------------------------------------------------------------------------------------------------------------------------------------------|
| 48 chr6 | p21.32 | 32455274  | 32497381  | 6  | 1.243.609 | 0.000000  | 7,72E-24 | HLA-DRB5          | omimGene:604776 | CNV_3603, CNV_4493, CNV_64476, CNV_7567, CNV_37840, CNV_69469, CNV_69421, CNV_69472, CNV_31280, CNV_4767, CNV_111517, CNV_107632, CNV_111516, CNV_111496, CNV_81335, CNV_81336, CNV_81340, CNV_81342, CNV_81343, CNV_93642, CNV_93646, CNV_103651, CNV_23237, CNV_111505, CNV_111527, CNV_69411, CNV_69414, CNV_32790, CNV_111524, CNV_59326, CNV_37538, CNV_69427, CNV_69442, CNV_69416, CNV_81337, CNV_93647, CNV_69443, CNV_38969, CNV_81344, CNV_111507, CNV_111495, CNV_111529, CNV_69438, CNV_32791, CNV_111531, CNV_69444, CNV_69440, CNV_63176, CNV_69458, CNV_111503, CNV_106274, CNV_103652, CNV_59327, CNV_69445 |
| 49 chr7 | q33    | 133594273 | 133695190 | 18 | 0.571454  | 0.000000  | 7,54E-28 | EXOC4             | omimGene:608185 | CNV_3704                                                                                                                                                                                                                                                                                                                                                                                                                                                                                                                                                                                                                    |
| 50 chr7 | q34    | 141771233 | 141792094 | 5  | 0.000000  | -0.989797 | 4,54E-20 | MGAM              | omimGene:154360 | CNV_3706, CNV_64964, CNV_64965, CNV_53811, CNV_31393, CNV_53904, CNV_30265, CNV_9586, CNV_10212, CNV_37566, CNV_52111, CNV_52112, CNV_52113, CNV_53831, CNV_53845, CNV_54002, CNV_52114, CNV_7607, CNV_52115, CNV_52116, CNV_52117, CNV_112000, CNV_59387, CNV_103758, CNV_32953, CNV_37997, CNV_1744, CNV_10211, CNV_30264, CNV_52118, CNV_52119, CNV_52120, CNV_52121, CNV_52122, CNV_53977, CNV_54016, CNV_52123, CNV_52124, CNV_52125, CNV_52126, CNV_36627, CNV_52127, CNV_31394                                                                                                                                       |
| 51 chr8 | p11.22 | 39234992  | 39386158  | 28 | 0.609156  | 0.000000  | 9,55E-48 | ADAM5P,<br>ADAM3A |                 | CNV_2749, CNV_36815, CNV_105114, CNV_112161, CNV_59473, CNV_36816, CNV_105798, CNV_65114, CNV_106294, CNV_37462, CNV_7683, CNV_82574, CNV_95380, CNV_106595, CNV_31439, CNV_1779, CNV_103790, CNV_106668, CNV_33030, CNV_38096, CNV_1462, CNV_107920, CNV_3728, CNV_1197, CNV_1463, CNV_1198, CNV_112162, CNV_1460, CNV_1199, CNV_1200, CNV_1461, CNV_1465, CNV_95381, CNV_1464, CNV_112166                                                                                                                                                                                                                                 |

|          |        |           |           |             |           |                                                                                            |                                                                                                                                                                                                                                                                                                                                                                                                                                                                                                                                                                                                                                                                                                                                                                                                                                                                                                                                                                                                                                                                                                                                                                                                                                                                                                                                                                                                                                                                                                                                                                                                                                                                                                                                            |
|----------|--------|-----------|-----------|-------------|-----------|--------------------------------------------------------------------------------------------|--------------------------------------------------------------------------------------------------------------------------------------------------------------------------------------------------------------------------------------------------------------------------------------------------------------------------------------------------------------------------------------------------------------------------------------------------------------------------------------------------------------------------------------------------------------------------------------------------------------------------------------------------------------------------------------------------------------------------------------------------------------------------------------------------------------------------------------------------------------------------------------------------------------------------------------------------------------------------------------------------------------------------------------------------------------------------------------------------------------------------------------------------------------------------------------------------------------------------------------------------------------------------------------------------------------------------------------------------------------------------------------------------------------------------------------------------------------------------------------------------------------------------------------------------------------------------------------------------------------------------------------------------------------------------------------------------------------------------------------------|
| 52 chr14 | q11.2  | 19376762  | 20420849  | 35 0.000000 | -0.509071 | 1,97E-42 OR11H12,<br>POTEG, P704P,<br>OR4Q3,<br>OR4M1,<br>OR4N2,<br>OR4K2,<br>OR4K5, OR4K1 | CNV_7028, CNV_58655, CNV_76530, CNV_87085, CNV_31953, CNV_71830,<br>CNV_71837, CNV_87086, CNV_87087, CNV_113648, CNV_71851, CNV_71863,<br>CNV_38838, CNV_113649, CNV_71840, CNV_76531, CNV_87088, CNV_37153,<br>CNV_2174, CNV_110092, CNV_71850, CNV_76533, CNV_87091, CNV_87092,<br>CNV_87093, CNV_113650, CNV_106643, CNV_106171, CNV_0812, CNV_2256,<br>CNV_4822, CNV_71852, CNV_4823, CNV_71839, CNV_76534, CNV_76535,<br>CNV_87095, CNV_87096, CNV_76536, CNV_3929, CNV_37621, CNV_71853,<br>CNV_71841, CNV_37154, CNV_106382, CNV_30646, CNV_76537, CNV_76539,<br>CNV_87097, CNV_87098, CNV_71836, CNV_71861, CNV_71833, CNV_71844,<br>CNV_30647, CNV_106383, CNV_76541, CNV_113651, CNV_71854, CNV_76542,<br>CNV_87099, CNV_87102, CNV_87103, CNV_76543, CNV_87104, CNV_87101,<br>CNV_71838, CNV_76544, CNV_76545, CNV_71855, CNV_106384, CNV_87100,<br>CNV_71856, CNV_76546, CNV_87105, CNV_87106, CNV_76547, CNV_76548,<br>CNV_76549, CNV_87107, CNV_71857, CNV_71835, CNV_76550, CNV_87108,<br>CNV_87109, CNV_76552, CNV_87110, CNV_4824, CNV_113652, CNV_71858,<br>CNV_4825, CNV_71842, CNV_76551, CNV_87111, CNV_76553, CNV_76554,<br>CNV_87112, CNV_87114, CNV_87115, CNV_66584, CNV_30648, CNV_87116,<br>CNV_76557, CNV_71832, CNV_106385, CNV_87117, CNV_0316, CNV_71859,<br>CNV_113654, CNV_113655, CNV_38951, CNV_104041, CNV_87118, CNV_3036,<br>CNV_8762, CNV_8763, CNV_8765, CNV_9234, CNV_34547, CNV_34575,<br>CNV_34656, CNV_34660, CNV_34664, CNV_4826, CNV_34659, CNV_8764,<br>CNV_9235, CNV_71831, CNV_71834, CNV_34563, CNV_76556, CNV_71860,<br>CNV_87113, CNV_49301, CNV_49302, CNV_49303, CNV_49304, CNV_76555,<br>CNV_76558, CNV_101886, CNV_101887, CNV_4827, CNV_2175, CNV_66583,<br>CNV_76559, CNV_101888 |
| 53 chr14 | q32.33 | 106875948 | 106931193 | 12 0.000000 | -0.728304 | 3,25E-27                                                                                   | CNV_10460, CNV_7026, CNV_113813, CNV_35213, CNV_0317, CNV_35219,<br>CNV_35220, CNV_22954, CNV_7027, CNV_1956, CNV_76774, CNV_87415,<br>CNV_72030, CNV_4856, CNV_113829, CNV_72017, CNV_0182, CNV_72049,<br>CNV_72044, CNV_5322, CNV_87418, CNV_4857, CNV_35234, CNV_72010,<br>CNV_102035, CNV_76777, CNV_113836, CNV_72037, CNV_108102,<br>CNV_113862, CNV_72081, CNV_72008, CNV_106381, CNV_87416, CNV_22914,<br>CNV_59724, CNV_23308, CNV_87412, CNV_76778, CNV_113816, CNV_71999,<br>CNV_76779, CNV_76780, CNV_87423, CNV_87424, CNV_87425, CNV_4858,<br>CNV_9735, CNV_9736, CNV_9739, CNV_10455, CNV_10456, CNV_10458,<br>CNV_10459, CNV_49296, CNV_49297, CNV_49298, CNV_53475, CNV_53711,<br>CNV_53925, CNV_53949, CNV_53956, CNV_53963                                                                                                                                                                                                                                                                                                                                                                                                                                                                                                                                                                                                                                                                                                                                                                                                                                                                                                                                                                                              |

|                             |               |          |          |              |                  |           |                                                                          |                   |                                                                                                                                                                                                                                                                                                                                                                                                                                                                                                                                                                                                                                                                                                                                                                                                                                                                                                                                                                                                                                                                                                                                                                                                                                                                                                                                                                                                                                                                                                                                                                                                                                                                                  |
|-----------------------------|---------------|----------|----------|--------------|------------------|-----------|--------------------------------------------------------------------------|-------------------|----------------------------------------------------------------------------------------------------------------------------------------------------------------------------------------------------------------------------------------------------------------------------------------------------------------------------------------------------------------------------------------------------------------------------------------------------------------------------------------------------------------------------------------------------------------------------------------------------------------------------------------------------------------------------------------------------------------------------------------------------------------------------------------------------------------------------------------------------------------------------------------------------------------------------------------------------------------------------------------------------------------------------------------------------------------------------------------------------------------------------------------------------------------------------------------------------------------------------------------------------------------------------------------------------------------------------------------------------------------------------------------------------------------------------------------------------------------------------------------------------------------------------------------------------------------------------------------------------------------------------------------------------------------------------------|
| 54 chr15                    | q11.1 - q11.2 | 20571586 | 22173977 | 56 0.312967  | 0.000000         | 5,08E-27  | GOLGA6L6,<br>GOLGA8C,<br>BCL8, POTEB,<br>NF1P1,<br>LOC646214,<br>CXADRP2 | omimGene:601889   | CNV_3951, CNV_3070, CNV_49466, CNV_49467, CNV_49468, CNV_49469, CNV_49470, CNV_49471, CNV_8779, CNV_8780, CNV_8781, CNV_8784, CNV_9251, CNV_34504, CNV_34562, CNV_34576, CNV_9250, CNV_9253, CNV_34608, CNV_34665, CNV_31980, CNV_30670, CNV_76794, CNV_87446, CNV_35284, CNV_0318, CNV_72097, CNV_87450, CNV_105467, CNV_113869, CNV_7046, CNV_34663, CNV_72116, CNV_76802, CNV_37625, CNV_87451, CNV_113870, CNV_0776, CNV_2181, CNV_58702, CNV_72112, CNV_76795, CNV_87443, CNV_35291, CNV_72115, CNV_106392, CNV_113871, CNV_38976, CNV_106645, CNV_76804, CNV_87445, CNV_87453, CNV_35292, CNV_0442, CNV_35293, CNV_72092, CNV_102039, CNV_108468, CNV_23174, CNV_72114, CNV_76805, CNV_76806, CNV_22641, CNV_1957, CNV_39159, CNV_9255, CNV_0443, CNV_0444, CNV_110096, CNV_72111, CNV_4865, CNV_72123, CNV_4866, CNV_72124, CNV_66724, CNV_72142, CNV_76807, CNV_87454, CNV_72143, CNV_72125, CNV_87455, CNV_4867, CNV_87456, CNV_76808, CNV_72126, CNV_72127, CNV_59597, CNV_113872, CNV_34545, CNV_8785, CNV_9254, CNV_72128, CNV_8783, CNV_23136, CNV_113877, CNV_0775, CNV_2180, CNV_4870, CNV_76809, CNV_87457, CNV_87458, CNV_76810, CNV_108479, CNV_9256, CNV_76811, CNV_87459, CNV_87460, CNV_76812, CNV_4871, CNV_76814, CNV_76818, CNV_87462, CNV_87465, CNV_87466, CNV_34607, CNV_72130, CNV_102040, CNV_102041, CNV_72129, CNV_102042, CNV_102043, CNV_9742, CNV_102044, CNV_72121, CNV_113876, CNV_63050, CNV_113874, CNV_113873, CNV_72122, CNV_72141, CNV_113878, CNV_8786, CNV_72120, CNV_72132, CNV_72139, CNV_4863, CNV_72140, CNV_72133, CNV_72134, CNV_87467, CNV_87468, CNV_72135, CNV_72144, CNV_72119, CNV_76815, CNV_72137, CNV_106393, CNV_59725 |
| 55 chr15                    | q22.2         | 60800311 | 61056864 | 60 0.636268  | 0.000000         | 6,24E-115 | RORA                                                                     | omimGene:600825   | CNV_113955                                                                                                                                                                                                                                                                                                                                                                                                                                                                                                                                                                                                                                                                                                                                                                                                                                                                                                                                                                                                                                                                                                                                                                                                                                                                                                                                                                                                                                                                                                                                                                                                                                                                       |
| 56 chr20                    | p13           | 1563715  | 1577359  | 4 0.000000   | -1.976.575       | 6,40E-35  | SIRPB1                                                                   |                   | CNV_4090, CNV_35897, CNV_35898, CNV_0536, CNV_35899, CNV_104442, CNV_114874, CNV_67634, CNV_35900, CNV_104187, CNV_35901, CNV_35902, CNV_35903, CNV_35904, CNV_1522, CNV_7297, CNV_79098, CNV_79099, CNV_90432, CNV_90433, CNV_35905, CNV_110389, CNV_22910, CNV_61903, CNV_107995, CNV_37839, CNV_102897, CNV_90434, CNV_114876, CNV_31029, CNV_32405, CNV_1992, CNV_90435                                                                                                                                                                                                                                                                                                                                                                                                                                                                                                                                                                                                                                                                                                                                                                                                                                                                                                                                                                                                                                                                                                                                                                                                                                                                                                      |
| 57 chr21                    | q22.3         | 45445332 | 45617046 | 40 0.458105  | 0.000000         | 2,41E-39  | TRAPPC10,<br>PWP2,<br>C21orf33                                           |                   | CNV_7327, CNV_59777                                                                                                                                                                                                                                                                                                                                                                                                                                                                                                                                                                                                                                                                                                                                                                                                                                                                                                                                                                                                                                                                                                                                                                                                                                                                                                                                                                                                                                                                                                                                                                                                                                                              |
| 58 chrX                     | p22.33        | 81548    | 92387    | 4 0.000000   | -1.145.587       | 8,49E-22  |                                                                          |                   | CNV_73882, CNV_83235, CNV_83236, CNV_96362, CNV_73883, CNV_96363                                                                                                                                                                                                                                                                                                                                                                                                                                                                                                                                                                                                                                                                                                                                                                                                                                                                                                                                                                                                                                                                                                                                                                                                                                                                                                                                                                                                                                                                                                                                                                                                                 |
| 59 chrX                     | p21.1         | 31986625 | 32863006 | 188 0.000000 | -1.087.190 0.000 |           | DMD                                                                      | omimMorbid:300377 | CNV_52980, CNV_73952, CNV_52981, CNV_1845, CNV_67956                                                                                                                                                                                                                                                                                                                                                                                                                                                                                                                                                                                                                                                                                                                                                                                                                                                                                                                                                                                                                                                                                                                                                                                                                                                                                                                                                                                                                                                                                                                                                                                                                             |
| 60 chrX                     | p21.1         | 32279743 | 32344451 | 14 0.000000  | -4.561.102       | 1,05E-144 | DMD                                                                      | omimMorbid:300377 | CNV_52980                                                                                                                                                                                                                                                                                                                                                                                                                                                                                                                                                                                                                                                                                                                                                                                                                                                                                                                                                                                                                                                                                                                                                                                                                                                                                                                                                                                                                                                                                                                                                                                                                                                                        |
| 61 chrY                     | p11.32        | 31548    | 42387    | 4 0.000000   | -1.145.587       | 8,49E-22  |                                                                          |                   | CNV_83894, CNV_97143                                                                                                                                                                                                                                                                                                                                                                                                                                                                                                                                                                                                                                                                                                                                                                                                                                                                                                                                                                                                                                                                                                                                                                                                                                                                                                                                                                                                                                                                                                                                                                                                                                                             |
| wt_ihg2016_252185028565_1_1 |               |          |          |              |                  |           |                                                                          |                   |                                                                                                                                                                                                                                                                                                                                                                                                                                                                                                                                                                                                                                                                                                                                                                                                                                                                                                                                                                                                                                                                                                                                                                                                                                                                                                                                                                                                                                                                                                                                                                                                                                                                                  |
| 62 chr1                     | p31.1         | 72768855 | 72795480 | 5 0.000000   | -3.582.584       | 7,29E-61  |                                                                          |                   | CNV_4229, CNV_0383, CNV_34829, CNV_3293, CNV_34830, CNV_34831, CNV_34832, CNV_34833, CNV_74531, CNV_74532, CNV_84304, CNV_105572, CNV_23231, CNV_97396, CNV_60842, CNV_103487, CNV_22923, CNV_58405, CNV_104750, CNV_111188, CNV_43688, CNV_64030, CNV_6832, CNV_30388, CNV_31627, CNV_1005, CNV_1006, CNV_1543, CNV_37834, CNV_1009, CNV_84305, CNV_74533                                                                                                                                                                                                                                                                                                                                                                                                                                                                                                                                                                                                                                                                                                                                                                                                                                                                                                                                                                                                                                                                                                                                                                                                                                                                                                                       |

|         |               |           |           |             |            |                           |                   |                                                                                                                                                                                                                                                                                                                                                                                                                                                                                                                                                                                                                                                                                                                                                                                                                                                                                                                                                                                                                                                                                                                                                                                                                                                                                                                                                                                                                                                                                                                          |
|---------|---------------|-----------|-----------|-------------|------------|---------------------------|-------------------|--------------------------------------------------------------------------------------------------------------------------------------------------------------------------------------------------------------------------------------------------------------------------------------------------------------------------------------------------------------------------------------------------------------------------------------------------------------------------------------------------------------------------------------------------------------------------------------------------------------------------------------------------------------------------------------------------------------------------------------------------------------------------------------------------------------------------------------------------------------------------------------------------------------------------------------------------------------------------------------------------------------------------------------------------------------------------------------------------------------------------------------------------------------------------------------------------------------------------------------------------------------------------------------------------------------------------------------------------------------------------------------------------------------------------------------------------------------------------------------------------------------------------|
| 63 chr1 | q21.3         | 152556449 | 152581944 | 6 0.000000  | -1.914.994 | 2,15E-59 LCE3C            | omimGene:612615   | CNV_8333, CNV_3314, CNV_53646, CNV_34711, CNV_34712, CNV_0393, CNV_34713, CNV_6786, CNV_74715, CNV_97511, CNV_84576, CNV_107201, CNV_22907, CNV_1558, CNV_103653, CNV_23222, CNV_105006, CNV_112109, CNV_37400, CNV_64960, CNV_38795, CNV_30438, CNV_31661, CNV_38961, CNV_1019, CNV_84577, CNV_74714, CNV_1018, CNV_31662                                                                                                                                                                                                                                                                                                                                                                                                                                                                                                                                                                                                                                                                                                                                                                                                                                                                                                                                                                                                                                                                                                                                                                                               |
| 64 chr2 | p11.2 - p11.1 | 89450514  | 91766271  | 40 0.000000 | -0.629424  | 3,43E-72                  |                   | CNV_34427, CNV_35873, CNV_107994, CNV_115389, CNV_104585, CNV_74122, CNV_59010, CNV_74104, CNV_34620, CNV_115397, CNV_74105, CNV_23246, CNV_4296, CNV_115405, CNV_78647, CNV_89796, CNV_74119, CNV_115399, CNV_7287, CNV_35877, CNV_74116, CNV_89797, CNV_89798, CNV_7288, CNV_89799, CNV_89800, CNV_89801, CNV_74109, CNV_4297, CNV_74103, CNV_104587, CNV_74117, CNV_104588, CNV_115406, CNV_78648, CNV_89802, CNV_89803, CNV_78649, CNV_78650, CNV_89804, CNV_2057, CNV_74126, CNV_74137, CNV_74127, CNV_115408, CNV_74125, CNV_74139, CNV_59011, CNV_104589, CNV_115410, CNV_37972, CNV_104236, CNV_2058, CNV_9954, CNV_50591, CNV_50592, CNV_1591, CNV_74138, CNV_68084, CNV_74128, CNV_78651, CNV_78652, CNV_89805, CNV_89806, CNV_78653, CNV_89807, CNV_89808, CNV_74129, CNV_4298, CNV_9956, CNV_50596, CNV_50597, CNV_50598, CNV_115409, CNV_78656, CNV_1353, CNV_59607, CNV_78654, CNV_74136, CNV_74141, CNV_74130, CNV_59012, CNV_78655, CNV_74131, CNV_74135, CNV_104590, CNV_89809, CNV_89810, CNV_23275, CNV_74140, CNV_68083, CNV_35878, CNV_1355, CNV_1354, CNV_9957, CNV_53731, CNV_35879, CNV_35880, CNV_59013, CNV_74132, CNV_35881, CNV_74133, CNV_30966, CNV_74134, CNV_3375, CNV_74142, CNV_97916, CNV_63132, CNV_22848, CNV_63181, CNV_115411, CNV_32325, CNV_32326, CNV_61793, CNV_23041, CNV_22637, CNV_74143, CNV_30967, CNV_35882, CNV_74147, CNV_74148, CNV_30968, CNV_74149, CNV_35883, CNV_30969, CNV_32327, CNV_35884, CNV_0527, CNV_35885, CNV_44038, CNV_115412, CNV_115413, CNV_115414 |
| 65 chr3 | q26.1         | 162514534 | 162619141 | 10 0.000000 | -3.739.900 | 4,33E-215                 |                   | CNV_30185, CNV_4359, CNV_3461, CNV_36095, CNV_0563, CNV_36096, CNV_98511, CNV_43698, CNV_63640, CNV_63641, CNV_104707, CNV_107837, CNV_110712, CNV_79986, CNV_91670, CNV_38805, CNV_103484, CNV_1649, CNV_107609, CNV_31126, CNV_7377, CNV_38965, CNV_32529, CNV_59583, CNV_59584, CNV_59608, CNV_91671, CNV_91672, CNV_110135, CNV_110510, CNV_4360, CNV_110136, CNV_1377, CNV_23278, CNV_59901, CNV_107999, CNV_110714, CNV_4361                                                                                                                                                                                                                                                                                                                                                                                                                                                                                                                                                                                                                                                                                                                                                                                                                                                                                                                                                                                                                                                                                       |
| 66 chr4 | q13.2         | 69387056  | 69483277  | 12 0.571615 | 0.000000   | 5,26E-18 UGT2B17, UGT2B15 | omimMorbid:601903 | CNV_3499, CNV_92177, CNV_38138, CNV_104781, CNV_110895, CNV_92178, CNV_106520, CNV_63852, CNV_31177, CNV_7448, CNV_23279, CNV_103525, CNV_38966, CNV_110896, CNV_110897, CNV_92179, CNV_1082, CNV_1083, CNV_1388, CNV_1389, CNV_110898, CNV_1390, CNV_1084, CNV_1085, CNV_1391, CNV_1392, CNV_63853, CNV_106521, CNV_92180, CNV_110900, CNV_110901, CNV_92181, CNV_106522, CNV_1087                                                                                                                                                                                                                                                                                                                                                                                                                                                                                                                                                                                                                                                                                                                                                                                                                                                                                                                                                                                                                                                                                                                                      |

|          |        |           |           |    |                    |                   |                                                                         |                                                                                                                                                                                                                                                                                                                                                                                                                                                                                                                                                                                                                             |                                                                                                                                                                                                                                                                                                                                                                                                                                                                                                                                                                                                                                                                                                                                                                                                                                                                                                                                                                                                                                                                                                                                                                                                                                                                                                                                                                                                                                                                                                                                                                                                                                                                    |
|----------|--------|-----------|-----------|----|--------------------|-------------------|-------------------------------------------------------------------------|-----------------------------------------------------------------------------------------------------------------------------------------------------------------------------------------------------------------------------------------------------------------------------------------------------------------------------------------------------------------------------------------------------------------------------------------------------------------------------------------------------------------------------------------------------------------------------------------------------------------------------|--------------------------------------------------------------------------------------------------------------------------------------------------------------------------------------------------------------------------------------------------------------------------------------------------------------------------------------------------------------------------------------------------------------------------------------------------------------------------------------------------------------------------------------------------------------------------------------------------------------------------------------------------------------------------------------------------------------------------------------------------------------------------------------------------------------------------------------------------------------------------------------------------------------------------------------------------------------------------------------------------------------------------------------------------------------------------------------------------------------------------------------------------------------------------------------------------------------------------------------------------------------------------------------------------------------------------------------------------------------------------------------------------------------------------------------------------------------------------------------------------------------------------------------------------------------------------------------------------------------------------------------------------------------------|
| 67 chr6  | p21.32 | 32455274  | 32497381  | 6  | 1.058.279 0.000000 | 5,42E-19 HLA-DRB5 | omimGene:604776                                                         | CNV_3603, CNV_4493, CNV_64476, CNV_7567, CNV_37840, CNV_69469, CNV_69421, CNV_69472, CNV_31280, CNV_4767, CNV_111517, CNV_107632, CNV_111516, CNV_111496, CNV_81335, CNV_81336, CNV_81340, CNV_81342, CNV_81343, CNV_93642, CNV_93646, CNV_103651, CNV_23237, CNV_111505, CNV_111527, CNV_69411, CNV_69414, CNV_32790, CNV_111524, CNV_59326, CNV_37538, CNV_69427, CNV_69442, CNV_69416, CNV_81337, CNV_93647, CNV_69443, CNV_38969, CNV_81344, CNV_111507, CNV_111495, CNV_111529, CNV_69438, CNV_32791, CNV_111531, CNV_69444, CNV_69440, CNV_63176, CNV_69458, CNV_111503, CNV_106274, CNV_103652, CNV_59327, CNV_69445 |                                                                                                                                                                                                                                                                                                                                                                                                                                                                                                                                                                                                                                                                                                                                                                                                                                                                                                                                                                                                                                                                                                                                                                                                                                                                                                                                                                                                                                                                                                                                                                                                                                                                    |
| 68 chr7  | q33    | 133589546 | 133695190 | 19 | 0.546312           | 0.000000          | 4,63E-27 EXOC4                                                          | omimGene:608185                                                                                                                                                                                                                                                                                                                                                                                                                                                                                                                                                                                                             | CNV_3704                                                                                                                                                                                                                                                                                                                                                                                                                                                                                                                                                                                                                                                                                                                                                                                                                                                                                                                                                                                                                                                                                                                                                                                                                                                                                                                                                                                                                                                                                                                                                                                                                                                           |
| 69 chr7  | q34    | 141766883 | 141792094 | 6  | 0.000000           | -0.823517         | 1,83E-17 MGAM                                                           | omimGene:154360                                                                                                                                                                                                                                                                                                                                                                                                                                                                                                                                                                                                             | CNV_3706, CNV_64964, CNV_64965, CNV_53811, CNV_31393, CNV_53904, CNV_30265, CNV_9586, CNV_10212, CNV_37566, CNV_52111, CNV_52112, CNV_52113, CNV_53831, CNV_53845, CNV_54002, CNV_52114, CNV_7607, CNV_36626, CNV_52115, CNV_52116, CNV_52117, CNV_112000, CNV_59387, CNV_103758, CNV_32953, CNV_37997, CNV_1744, CNV_10211, CNV_30264, CNV_52118, CNV_52119, CNV_52120, CNV_52121, CNV_52122, CNV_53977, CNV_54016, CNV_52123, CNV_52124, CNV_52125, CNV_52126, CNV_36627, CNV_52127, CNV_31394                                                                                                                                                                                                                                                                                                                                                                                                                                                                                                                                                                                                                                                                                                                                                                                                                                                                                                                                                                                                                                                                                                                                                                   |
| 70 chr8  | p11.22 | 39234992  | 39386158  | 28 | 0.643860           | 0.000000          | 1,17E-53 ADAM5P, ADAM3A                                                 |                                                                                                                                                                                                                                                                                                                                                                                                                                                                                                                                                                                                                             | CNV_2749, CNV_36815, CNV_105114, CNV_112161, CNV_59473, CNV_36816, CNV_105798, CNV_65114, CNV_106294, CNV_37462, CNV_7683, CNV_82574, CNV_95380, CNV_106595, CNV_31439, CNV_1779, CNV_103790, CNV_106668, CNV_33030, CNV_38096, CNV_1462, CNV_107920, CNV_3728, CNV_1197, CNV_1463, CNV_1198, CNV_112162, CNV_1460, CNV_1199, CNV_1200, CNV_1461, CNV_1465, CNV_95381, CNV_1464, CNV_112166                                                                                                                                                                                                                                                                                                                                                                                                                                                                                                                                                                                                                                                                                                                                                                                                                                                                                                                                                                                                                                                                                                                                                                                                                                                                        |
| 71 chr14 | q11.2  | 19376762  | 20420849  | 35 | 0.000000           | -0.525227         | 2,24E-45 OR11H12, POTE, P704P, OR4Q3, OR4M1, OR4N2, OR4K2, OR4K5, OR4K1 |                                                                                                                                                                                                                                                                                                                                                                                                                                                                                                                                                                                                                             | CNV_7028, CNV_58655, CNV_76530, CNV_87085, CNV_31953, CNV_71830, CNV_71837, CNV_87086, CNV_87087, CNV_113648, CNV_71851, CNV_71863, CNV_38838, CNV_113649, CNV_71840, CNV_76531, CNV_87088, CNV_37153, CNV_2174, CNV_110092, CNV_71850, CNV_76533, CNV_87091, CNV_87092, CNV_87093, CNV_113650, CNV_106643, CNV_106171, CNV_0812, CNV_2256, CNV_4822, CNV_71852, CNV_4823, CNV_71839, CNV_76534, CNV_76535, CNV_87095, CNV_87096, CNV_76536, CNV_3929, CNV_37621, CNV_71853, CNV_71841, CNV_37154, CNV_106382, CNV_30646, CNV_76537, CNV_76539, CNV_87097, CNV_87098, CNV_71836, CNV_71861, CNV_71833, CNV_71844, CNV_30647, CNV_106383, CNV_76541, CNV_113651, CNV_71854, CNV_76542, CNV_87099, CNV_87102, CNV_87103, CNV_76543, CNV_87104, CNV_87101, CNV_71838, CNV_76544, CNV_76545, CNV_71855, CNV_106384, CNV_87100, CNV_71856, CNV_76546, CNV_87105, CNV_87106, CNV_76547, CNV_76548, CNV_76549, CNV_87107, CNV_71857, CNV_71835, CNV_76550, CNV_87108, CNV_87109, CNV_76552, CNV_87110, CNV_4824, CNV_113652, CNV_71858, CNV_4825, CNV_71842, CNV_76551, CNV_87111, CNV_76553, CNV_76554, CNV_87112, CNV_87114, CNV_87115, CNV_66584, CNV_30648, CNV_87116, CNV_76557, CNV_71832, CNV_106385, CNV_87117, CNV_0316, CNV_71859, CNV_113654, CNV_113655, CNV_38951, CNV_104041, CNV_87118, CNV_3036, CNV_8762, CNV_8763, CNV_8765, CNV_9234, CNV_34547, CNV_34575, CNV_34656, CNV_34660, CNV_34664, CNV_4826, CNV_34659, CNV_8764, CNV_9235, CNV_71831, CNV_71834, CNV_34563, CNV_76556, CNV_71860, CNV_87113, CNV_49301, CNV_49302, CNV_49303, CNV_49304, CNV_76555, CNV_76558, CNV_101886, CNV_101887, CNV_4827, CNV_2175, CNV_66583, CNV_76559, CNV_101888 |



|          |        |          |          |              |            |           |                                |                   |                                                                                                                                                                                                                                                                                                                                                                                                                    |
|----------|--------|----------|----------|--------------|------------|-----------|--------------------------------|-------------------|--------------------------------------------------------------------------------------------------------------------------------------------------------------------------------------------------------------------------------------------------------------------------------------------------------------------------------------------------------------------------------------------------------------------|
| 72 chr14 | q24.3  | 74001651 | 74022324 | 4 0.000000   | -1.157.905 | 5,82E-20  | HEATR4,<br>ACOT1               | omimGene:614313   | CNV_3942, CNV_35265, CNV_87268, CNV_35266, CNV_105452, CNV_113740, CNV_35267, CNV_66664, CNV_35268, CNV_30658, CNV_76673, CNV_76674, CNV_87266, CNV_87267, CNV_87269, CNV_108324, CNV_35269, CNV_58686, CNV_101980, CNV_71916, CNV_104060, CNV_37822, CNV_106175, CNV_113737, CNV_113739, CNV_113741, CNV_76672, CNV_38974, CNV_7039, CNV_66665, CNV_71917, CNV_31974, CNV_22908, CNV_71918, CNV_23304, CNV_113743 |
| 73 chr15 | q22.2  | 60800311 | 61056864 | 60 0.649368  | 0.000000   | 4,55E-120 | RORA                           | omimGene:600825   | CNV_113955                                                                                                                                                                                                                                                                                                                                                                                                         |
| 74 chr20 | p13    | 1563715  | 1577359  | 4 0.000000   | -2.317.592 | 4,92E-37  | SIRPB1                         |                   | CNV_4090, CNV_35897, CNV_35898, CNV_0536, CNV_35899, CNV_104442, CNV_114874, CNV_67634, CNV_35900, CNV_104187, CNV_35901, CNV_35902, CNV_35903, CNV_35904, CNV_1522, CNV_7297, CNV_79098, CNV_79099, CNV_90432, CNV_90433, CNV_35905, CNV_110389, CNV_22910, CNV_61903, CNV_107995, CNV_37839, CNV_102897, CNV_90434, CNV_114876, CNV_31029, CNV_32405, CNV_1992, CNV_90435                                        |
| 75 chr21 | q22.3  | 45445332 | 45623174 | 41 0.509400  | 0.000000   | 7,54E-50  | TRAPPC10,<br>PWP2,<br>C21orf33 |                   | CNV_7327, CNV_59777, CNV_110451, CNV_103107, CNV_67804, CNV_104492, CNV_43382                                                                                                                                                                                                                                                                                                                                      |
| 76 chrX  | p22.33 | 81548    | 92387    | 4 0.000000   | -0.997456  | 4,71E-17  |                                |                   | CNV_73882, CNV_83235, CNV_83236, CNV_96362, CNV_73883, CNV_96363                                                                                                                                                                                                                                                                                                                                                   |
| 77 chrX  | p21.1  | 31986625 | 32863006 | 188 0.000000 | -1.098.318 | 0.000     | DMD                            | omimMorbid:300377 | CNV_52980, CNV_73952, CNV_52981, CNV_1845, CNV_67956                                                                                                                                                                                                                                                                                                                                                               |
| 78 chrX  | p21.1  | 32279743 | 32344451 | 14 0.000000  | -4.758.613 | 3,73E-151 | DMD                            | omimMorbid:300377 | CNV_52980                                                                                                                                                                                                                                                                                                                                                                                                          |
| 79 chrY  | p11.32 | 31548    | 42387    | 4 0.000000   | -0.997456  | 4,71E-17  |                                |                   | CNV_83894, CNV_97143                                                                                                                                                                                                                                                                                                                                                                                               |

Number of calls per sample:

C3\_ihg2016\_252185028566\_1\_2 =21

C2\_ihg2016\_252185028566\_1\_1 =20

C1\_ihg2016\_252185028566\_1\_2 =20

wt\_ihg2016\_252185028566\_1\_1 =18

Supplementary Figure S8: Array-CGH of gene corrected hPi-derived cell lines

A

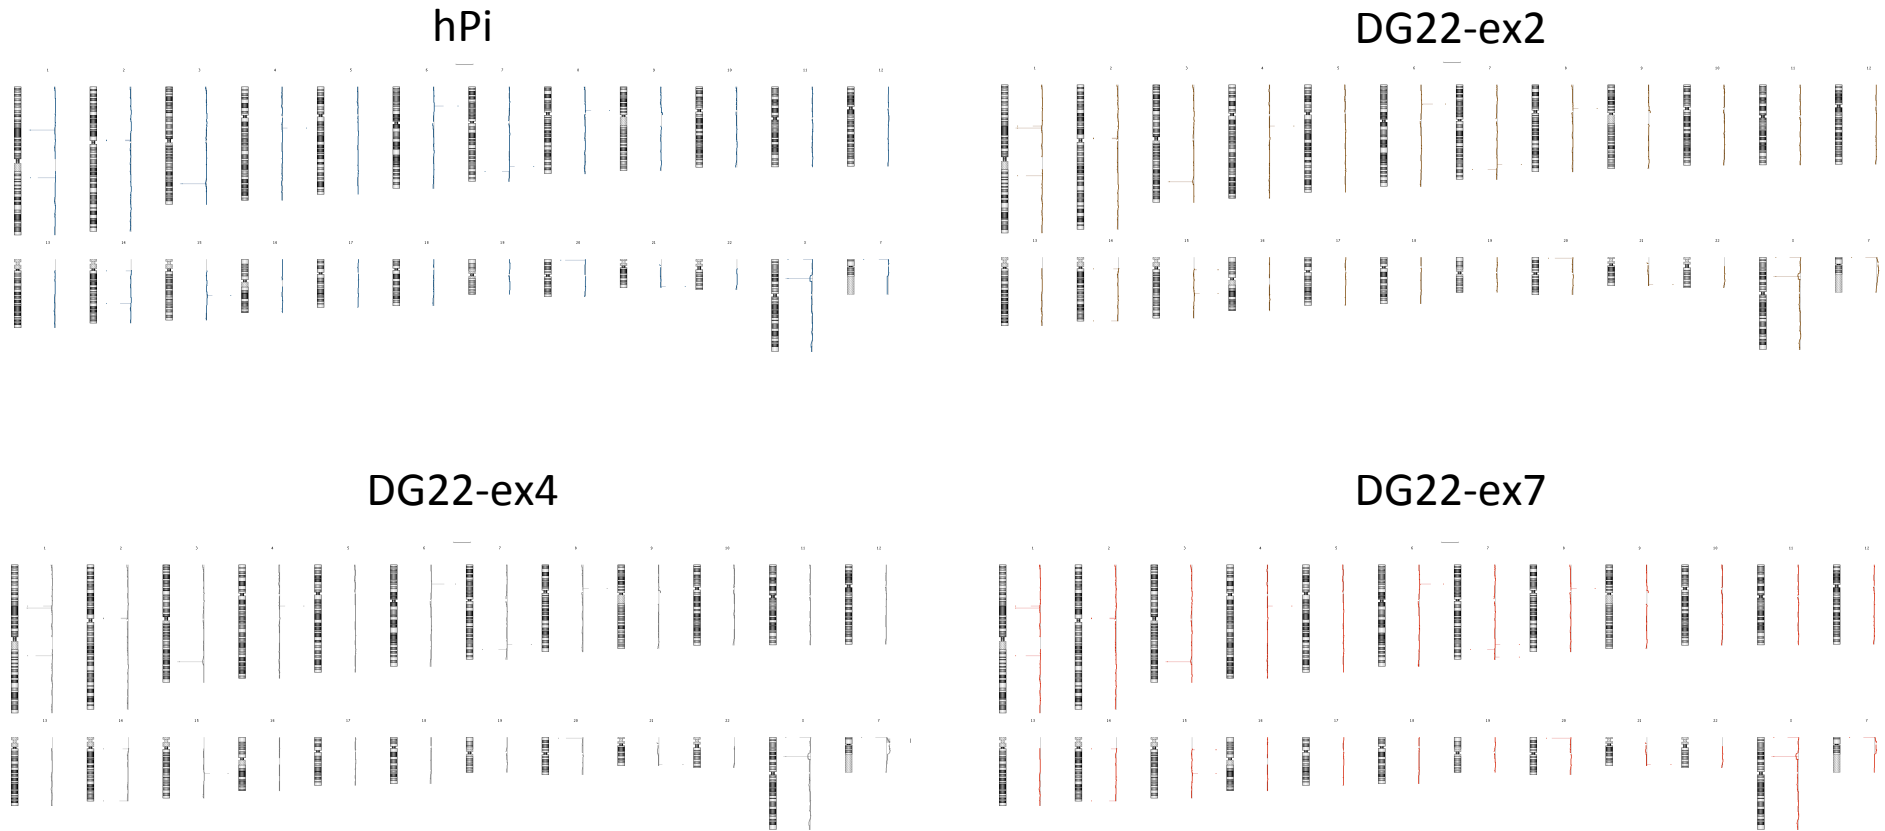

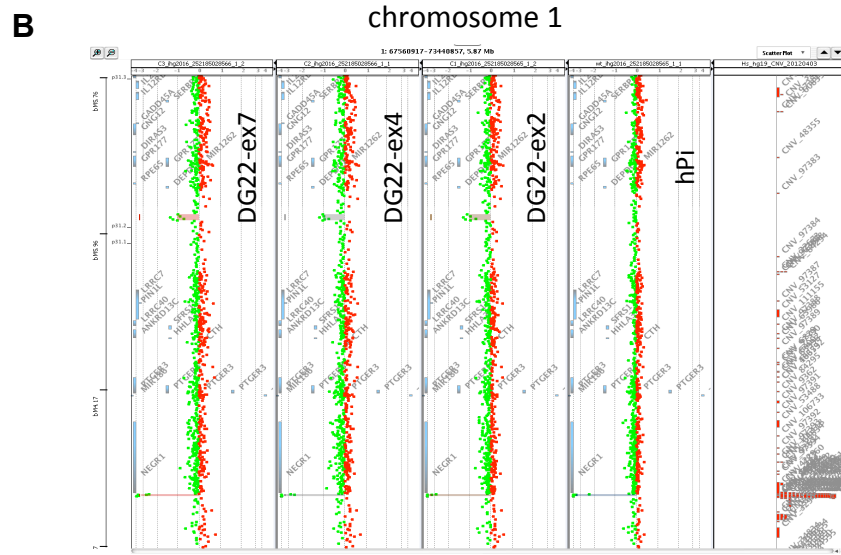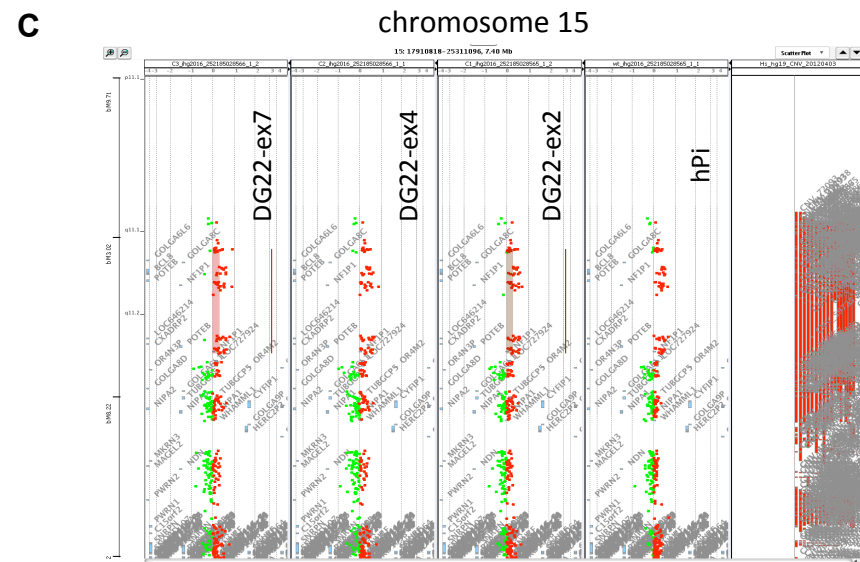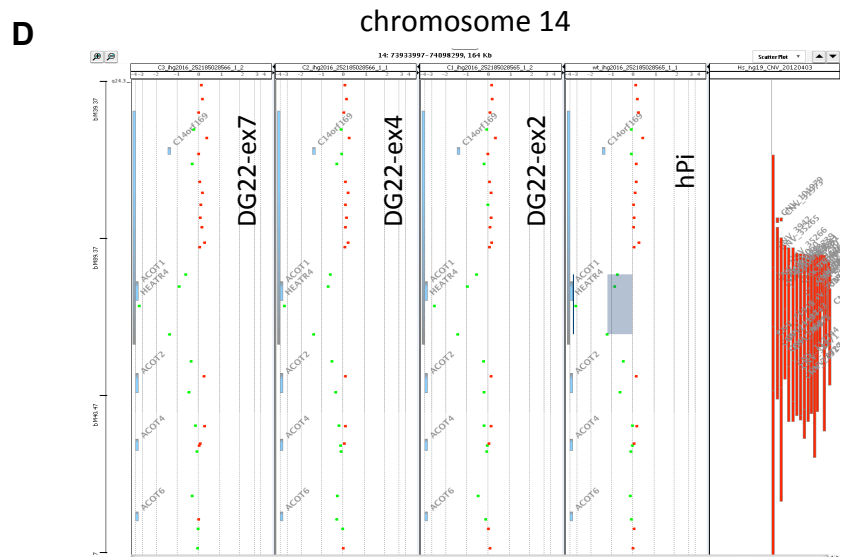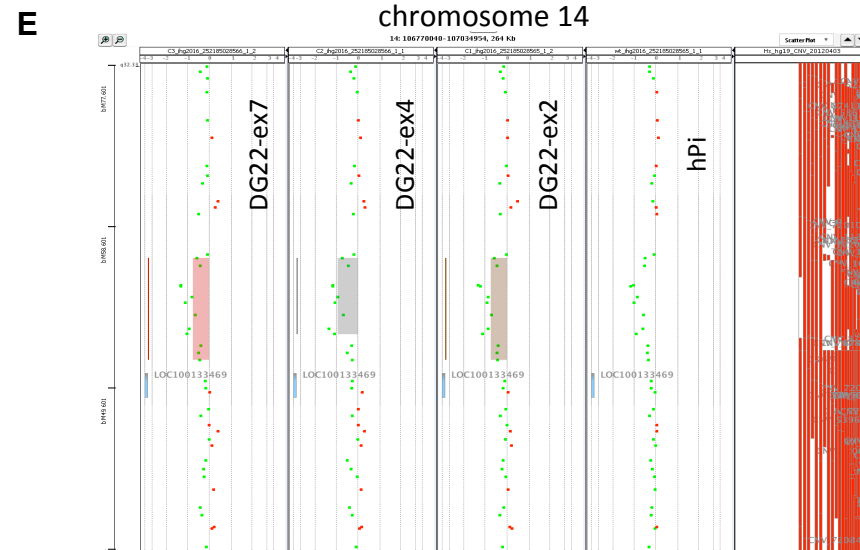

**Supplementary Figure S8: Array-CGH of gene corrected hPi-derived cell lines (A)** Overview on over all chromosomes. **(B)** Visible difference between hPi and gene corrected cells on non-coding region of chromosome 1. **(C-E)** Differences on chromosomes 14 and 15 detected by applied threshold settings with no visual difference.

## Supplementary Experimental Procedures:

### Cloning and plasmids

The promoter-less plasmid tGIP, encoding for a truncated version of eGFP followed by an IRES-puro cassette was purchased from Addgene (Addgene Plasmid #26864) and was used in all reporter assays as a donor, as previously described <sup>1</sup>. For cloning of the lentiviral CAG.eGFP-IRES-puro (Lenti CGIP) vector, tGIP was linearized by a partial Acc65I digest for 120 s followed by BsrGI digest. The resulting 1320 bp fragment encompassing the IRES-puro cassette was then ligated into the BsrGI-digested lentiviral vector pRRL.PPT.CAG.GFP.pre2 <sup>2</sup> and resulting clones were analyzed for correct orientation by AgeI + BsrGI double-digest. For cloning of the lentiviral PGK.eGFP-IRES-puro (Lenti PGIP) vector, the full PGK-EM7 cassette was amplified from the pMCS-AAT\_PB-PGKpuroTK plasmid (Wellcome Trust Sanger, <sup>3</sup>) using 'PGK ClaI for' and 'PGK XhoI rev' adapter-primers and inserted into pRRL.PPT.CAG.GFP.pre2 by a XhoI + ClaI digest, replacing the CAG promoter and resulting in 'Lenti PGK-EM7-GFP'. A fragment encompassing IRES-puro-PRE-SIN was generated by sequential SfiI and BsrGI digest of Lenti CGIP and ligated into Lenti PGK-EM7-GFP digested with the same enzymes resulting in Lenti PGIP.

For cloning of lentiviral vectors harboring the Z-AAT or M-AAT target sequences inside of the interrupted eGFP cassette (Lenti CiG-ZAAT-t-IP and Lenti CiG-MAAT-t-IP) the whole fragments encompassing the first 327 bp of eGFP followed by a TAA stop codon and the 59 bp target sequences for Z-AAT or M-AAT (**Supplementary Table S4**), followed by the remaining 393 bp of eGFP were synthesized by Eurofins Genomics (Ebersberg, Germany). Both sequences were flanked by AgeI restriction site at the 5' end and SgrDI site at the 3' end and cloned in place of the eGFP in the Lenti CGIP vector. TTR target sequence was cloned from a gene synthesis where TTR target sequence (**Supplementary Table S4**) was added after the TAA stop codon. Synthesized sequence included the Aval cloning site present in Lenti CiG-ZAAT-t-IP before the interrupted GFP (iGFP), as well as a part of eGFP, and an Ascl site present at the end of the ZAAT target sequence and was cloned using Aval + Ascl to replace the Z-AAT target sequence in Lenti CiG-ZAAT-t-IP, resulting in Lenti CiG-TTR-t-IP reporter vector. SOD1 target sequence was ordered as gene synthesis as well, including an AgeI site which was also present at the beginning of the TTR target sequence in Lenti CiG-TTR-t-IP and an Ascl site at the end of the target sequence (**Supplementary Table S4**). AgeI and Ascl digest was then used to replace TTR target sequence in Lenti CiG-TTR-t-IP, resulting in Lenti-CiG-SOD1-t-IP reporter vector.

Plasmids encoding for hCas9 and hCas9\_D10A, hCas9m2 and hCas9m4 were purchased from Addgene (Addgene Plasmids #41815, #41816, #47314, #47316, <sup>4,5</sup>). Plasmid encoding for hCas9\_H840A was generated by BamHI + BstXI digest and ligation of plasmids hCas9 (backbone) and hCas9m2 (insert). Plasmid encoding for hCas9\_N863A was generated by BamHI + BstXI digest of hCas9 (backbone), BamHI + BaeGI digest of hCas9 (insert #1) and BaeGI + BstXI digest of hCas9m4 (insert #2) followed by a triple ligation in a 1:3:3 molar ratio. Sequences encoding for the U6-promoter driven AAT\_g1, AAT\_g2, AAT\_g3 and AAT\_g4 gRNAs followed by the sgRNA scaffold were synthesized by Eurofins Genomics, Ebersberg, Germany and inserted into the pEX-A2 vector plasmid (Eurofins Genomics). Sequences of U6 promoter and sgRNA scaffold were adapted from Mali *et al.*, 2013 <sup>4</sup> and G+19 bp guide sequences inserted in between U6 promoter and sgRNA scaffold are given in **Supplementary Table S4**. TTR\_g1-g4 and SOD1\_g1-g5 gRNA expression vectors were cloned in a similar manner. Plasmid pCMV-hyPBBase for overexpression of hyperactive piggyBac transposase was obtained from Wellcome Trust Sanger <sup>3</sup>.

For cloning of the donor plasmids AAT-PB-CG2Ap $\Delta$ tk and AAT-PB-CD2Ap $\Delta$ tk, we first cloned the joints of the eGFP and DsRedEx fluorescence markers to the puromycin resistance over a T2A-self-cleaving peptidase site. Therefore, we first performed a PCR amplifying the T2A site from a previously published polycistronic lentiviral reprogramming vector, RRL.PPT.SF.hOct34.hKlf4.hSox2.i2dTomato.pre <sup>2</sup>, using 'T2A BsrGI for' and 'T2A Tth1111 rev' primers. The latter is a mega-primer which joins the beginning of the puromycin-resistance cassette to the end of the T2A site. The PCR amplicon was digested by BsrGI + Tth1111 and ligated into lenti CGIP vector digested with the same enzymes, thereby replacing the IRES cassette with a T2A site, resulting in 'Lenti CG2AP'. For joining of the DsRedEx to puromycin via T2A site, we first deleted the SexAI site inside the DsRedEx coding sequence by silent mutation using PCR with primers 'DsRed AgeI for' and 'DsRed SexAI mut rev'. The amplicon was digested using AgeI + MscI and inserted into a lentiviral plasmid encoding a SFFV promoter-driven DsRedEx sequence (pRRL.PPT.SF.DsRedEx.pre.snabi.H1AAT3, a kind gift from Prof. Axel Schambach, Hannover Medical School, Hannover, Germany), resulting in 'Lenti SFFV-DsRed\_SexAI\_mut'. The cloned DsRedEx sequence with a mutated SexAI site was then amplified again with 'DsRed AgeI for' and 'DsRed + YK rev' primers, thereby removing the stop codon and adding a BsrGI site including the codons for amino acids YK to DsRedEx, in order to leave the joint to the T2A sequence unchanged when comparing to the GFP-T2A-puro cassette. This amplicon was then digested using AgeI + BsrGI and ligated into Lenti CG2AP digested by the same enzymes, thereby replacing the eGFP cassette by DsRedEx, resulting in 'Lenti CD2AP'. Using fluorescence microscopy and FACS analysis, both

plasmids (Lenti CG2AP and Lenti CD2AP) were successfully tested for proper expression of fluorescence markers upon transfection of HEK 293T cells. Also both plasmids conveyed resistance to 3 µg/ml puromycin in transiently transfected HEK 293T cells. As a next step we have first exchanged the PGK promoter by the CAG promoter in the pMCS-AAT\_PB-PGKpuroTK plasmid. Therefore, we amplified the CMV and chicken beta actin – rabbit globin intron (CBA) elements of the CAG promoter separately using the plasmid pCAGGS2 eGFP as template (a kind gift from Dr. Robert Zweigerdt, MHH, Hannover, Germany). Amplification of the full CAG sequence was not working due to the high CG-content of the CAG promoter. For CMV *i/e* we used primers ‘CMV NheI for’ and ‘CMV MluI rev’, for the CBA element we used primers ‘CBA AscI for’ and ‘CBA PciI rev’ Both amplicons were ligated into the TOPO vector pCR2.1 (Invitrogen) and analyzed for orientation of the insertion. TOPO-CMV *i/e* was then digested using BamHI + MluI, whereas TOPO-CBA was digested using BamHI + AscI. The ~BamHI-CMV *i/e*-MluI~ fragment was then inserted into the TOPO-CBA, thereby adding the CMV *i/e* element and deleting the AscI restriction site, resulting in ‘TOPO-CAG(M/A)’. Next, we deleted the BsiWI site in the puromycin coding region of pMCS-AAT\_PB-PGKpuroTK by silent mutation using PCR amplification by primers ‘PGK AgeI for’ and ‘puro change RsrII rev’. The amplicon was digested using AgeI + RsrII enzymes and ligated into pMCS-AAT\_PB-PGKpuroTK digested by the same enzymes, resulting in pMCS-AAT\_PB-PGKpuro\_mut\_BsiWI\_TK. At this point it is important to mention that in parallel to the work presented here, we were also preparing constructs for targeting of the human TTR locus for another project. The route for the fewest total cloning steps for both projects led over an intermediate construct in which the left flanking arm was from the AAT sequence, whereas the right arm was from the TTR sequence. Therefore, we digested a plasmid containing the sequence of the right TTR flanking arm using BsiWI + PciI and ligated it into AAT\_PB-PGKpuro\_mut\_BsiWI\_TK digested by the same enzymes, thereby replacing the right AAT flanking arm by the right TTR flanking arm, resulting in the intermediate construct termed ‘AAT left - TTR right’. The CAG sequence was then excised from ‘TOPO-CAG(M/A)’ using NheI + PciI enzymes and ligated into ‘AAT left – TTR right’ digested by NheI + NcoI, thereby replacing the PGK promoter by the CAG promoter, resulting in ‘AAT left–CAG–TTR right’. The right AAT flanking arm was then switched back into the construct by digesting pMCS-AAT\_PB-PGKpuroTK and ‘AAT left–CAG–TTR right’ with PciI and NotI, resulting in ‘pMCS-AAT-PB-CAGpuroTK’. Next, Lenti CG2AP vector was digested using NdeI and RsrII enzymes and ligated into ‘pMCS-AAT-PB-CAGpuroTK’ digested by the same enzymes, thereby adding the eGFP-T2A sequence in front of the puro $\Delta tk$  cassette, resulting in AAT-PB-CG2Ap $\Delta tk$ . Finally, we digested ‘Lenti CD2AP’ using AgeI + SexAI and ligated it into AAT-PB-CG2Ap $\Delta tk$ , thereby replacing the eGFP cassette by DsRedEx, resulting in AAT-PB-CD2Ap $\Delta tk$ .

All PCRs for cloning and analysis of genomic sequences except for amplification of the GC-rich CBA element were performed using Phusion Hot Start II DNA Polymerase with HF-buffer (Thermo Scientific #F549L) according to manufacturer's procedures. The CBA element was amplified by touch-down PCR using Taq-polymerase with 10x (NH<sub>4</sub>)<sub>2</sub>SO<sub>4</sub> buffer (Fermentas, Thermo Scientific), 1 μM MgCl<sub>2</sub>, 0.2 nM dNTPs, 0.2 μM each primer and 10 % DMSO. Touchdown PCR was started by preheating to 95°C (hot start) and 10 min initial denaturation, followed by 22 cycles of 95°C denaturation for 30s, 65°C (-0.35°C/cycle) touchdown annealing for 30s and 72°C extension for 130s and then by 10 cycles of 95°C for 30s, 55°C for 30s and 72°C for 130s. Cloning primer sequences can be found in **Supplementary Table S4**. All cloned PCR products as well as southern blot probes were analyzed and confirmed by sequencing.

#### **RNA isolation, cDNA synthesis and TaqMan® qRT PCR**

RNA from differentiated or pluripotent cells was isolated using the peqGOLD Total RNA Kit (Peqlab) and subsequently used for cDNA synthesis using the SuperScript™ First-Strand Synthesis System (Invitrogen), both according to manufacturer's instructions. CDNA was used for qRT-PCR analysis with TaqMan® probes from Applied Biosystems on the StepOne Plus cycler and all values were normalized to GAPDH. The following probes were used for the analyzed genes:

GAPDH: Hs02758991\_g1; AFP: Hs01040595\_g1; ALB: Hs00609403\_m1; CK18: Hs01941416\_g1; CYP1A1: Hs01054797\_g1; SERPINA1 (AAT): Hs01097800\_m1; TTR: Hs00174914\_m1; OCT4: Hs03005111\_g1; SOX2: Hs01053049\_s1; NANOG: Hs00609403\_m1
